# Supplementary material for: Algorithm for optimized mRNA design improves stability and immunogenicity
Source: Springer Nature journal article supplement (doi:10.1038/s41586-023-06127-z), 2023-05-02
Supplement: 41586_2023_6127_MOESM1_ESM.pdf [file 41586_2023_6127_MOESM1_ESM.pdf]

## Supplementary information

---

# Algorithm for optimized mRNA design improves stability and immunogenicity

---

In the format provided by the authors and unedited

# Supplementary Information

## Algorithm for Optimized mRNA Design Improves Stability and Immunogenicity

### List of Supplementary Information

- Supplementary Figures
  - [Supplementary Figure 1](#): uncropped non-denaturing agarose gel images
  - [Supplementary Figure 2](#): pseudocode of a (simplified) bottom-up version of our mRNA Design algorithm
  - [Supplementary Figure 3](#): pseudocode of supporting functions
  - [Supplementary Figure 4](#): pseudocode of (simplified) LinearDesign algorithm
  - [Supplementary Figure 5](#): examples of DFA representations for coding constraints
  - [Supplementary Figure 6](#): illustration of the difference in codon representation between LinearDesign and CDSfold
  - [Supplementary Figure 7](#): illustration of the difference in computational complexity between LinearDesign and CDSfold
  - [Supplementary Figure 8](#): additional time complexity analysis
  - [Supplementary Figure 9](#): search error of LinearDesign’s beam search mode
  - [Supplementary Figure 10](#): secondary structures of sequences used in the COVID mRNA vaccines experiments
  - [Supplementary Figure 11](#): secondary structures of sequences used in the VZV mRNA vaccines experiments
  - [Supplementary Figure 12](#): protein expression of Spike mRNAs in HEK293 cells
- Supplementary Tables
  - [Supplementary Table 1](#): UniProt sequences used for runtime analysis
  - [Supplementary Table 2](#): statistics of sequences used in the COVID mRNA vaccine experiments
  - [Supplementary Table 3](#): statistics of sequences used in the VZV mRNA vaccine experiments
- Supplementary Sequence Information
  - Sequences used in the COVID mRNA vaccine experiments, including coding region sequences A–H and BNT, and 5’ and 3’ UTR sequences
  - Sequences used in the VZV mRNA vaccine experiments, including coding region sequences gE A–E, gE-Ther and gE-WT, and 5’ and 3’ UTR sequences

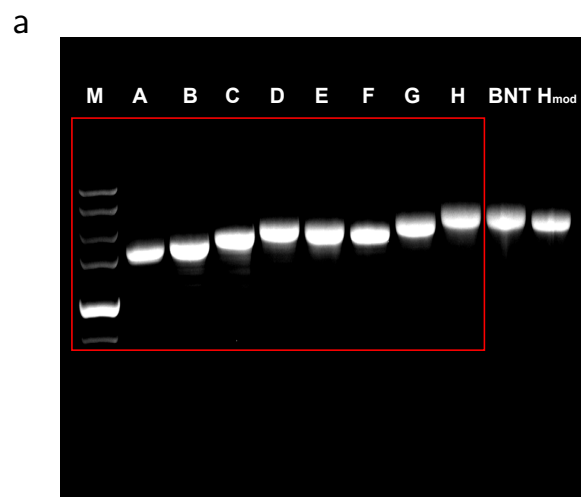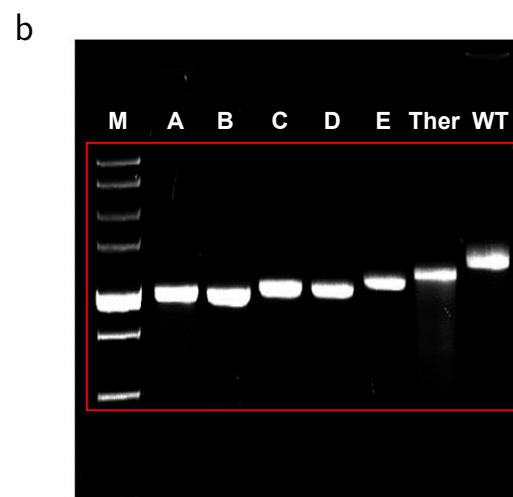

Supplementary Figure 1: Uncropped non-denaturing agarose gel images. **a**, Gel image of the Spike mRNAs. H<sub>mod</sub> represents the chemical modified version of H. **b**, Gel image of the VZV gE mRNAs. Red frames indicate the cropped sections shown in Figs. 4b and 5b.

```

1: function BOTTOMUPDESIGN(p,  $\lambda$ )           ▷ p: protein sequence;  $\lambda$ : weight of CAI
2:    $n \leftarrow 3 \cdot (|\mathbf{p}| + 1)$            ▷ mRNA length; +1 for the stop codon
3:    $D \leftarrow D(x_1) \circ D(x_2) \circ \dots \circ D(\text{stop})$    ▷ build (CAI-integrated) mRNA DFA
4:    $best \leftarrow \text{hash}()$                  ▷ hash table: from  $[X, q_i, q_j]$  to score
5:    $back \leftarrow \text{hash}()$                ▷ hash table: from  $[X, q_i, q_j]$  to backpointer
6:   for  $i = 0 \dots (n - 3)$  do             ▷ base case:  $S \xrightarrow{0} N N N$ 
7:     for each  $q_i \in \text{nodes}(D, i)$  do
8:       for each  $q_{i+3} \in \text{nodes}(D, i + 3)$  do
9:          $best[S, q_i, q_{i+3}] \leftarrow \text{mincost}(q_i, q_{i+3}, \lambda)$  ▷ best cost of any  $q_i \rightsquigarrow q_{i+3}$  path (Eq. 7)
10:    for  $l = 2 \dots n$  do                 ▷  $l = (j - i)$  is the span width
11:      for  $i = 0 \dots (n - l)$  do
12:         $j \leftarrow i + l$ 
13:        for each  $q_i \in \text{nodes}(D, i)$  do
14:          for each  $q_j \in \text{nodes}(D, j)$  do
15:            for each  $q_{j-1} \xrightarrow{b:w_b} q_j \in \text{in\_edges}(D, q_j)$  do           ▷  $q_i \xrightarrow{S} q_{j-1} \xrightarrow{b} q_j$ 
16:              UPDATE( $S, q_i, q_j, best[S, q_i, q_{j-1}] + \lambda w_b, (q_{j-1}, b)$ )           ▷  $S \xrightarrow{0} S N$ 
17:              if  $j - i > 4$  then           ▷ pairing (no sharp turn)
18:                for each  $q_i \xrightarrow{a:w_a} q_{i+1} \in \text{out\_edges}(D, q_i)$  do           ▷  $q_i \xrightarrow{a} q_{i+1} \xrightarrow{S} q_{j-1} \xrightarrow{b} q_j$ 
19:                  if  $\Delta G(a, b) < 0$  then           ▷  $\Delta G(C, G) = -3; \Delta G(A, U) = -2; \dots$ 
20:                     $score \leftarrow best[S, q_{i+1}, q_{j-1}] + \lambda(w_a + w_b) + \Delta G(a, b)$    ▷  $P \xrightarrow{-3} C S G | \dots$ 
21:                    UPDATE( $P, q_i, q_j, score, (a, q_{i+1}, q_{j-1}, b)$ )
22:                  for  $k = (i + 1) \dots (j - 1)$  do           ▷ bifurcation midpoint
23:                    for each  $q_k \in \text{nodes}(D, k)$  do           ▷  $q_i \xrightarrow{S} q_k \xrightarrow{P} q_j$ 
24:                       $score \leftarrow best[S, q_i, q_k] + best[P, q_k, q_j]$            ▷  $S \xrightarrow{0} S P$ 
25:                      UPDATE( $S, q_i, q_j, score, q_k$ )
26:    return  $best[S, q_0, q_n], \text{BACKTRACE}(S, q_0, q_n)$ 

```

Supplementary Figure 2: The pseudocode of a simplified bottom-up version of our mRNA Design algorithm for the joint optimization between stability and codon optimality. The costs in purple are for CAI integration. See Methods §1.5 for more algorithm description, and [Supplementary Figure 3](#) for UPDATE and BACKTRACE functions.

```

1: function UPDATE( $X, q_i, q_j, score, backpointer$ )
2:   if key ( $X, q_i, q_j$ ) not in best or  $score < best[X, q_i, q_j]$  then      ▷ minimizing weight
3:      $best[X, q_i, q_j] \leftarrow score$ 
4:      $back[X, q_i, q_j] \leftarrow backpointer$ 

1: function BACKTRACE( $X, q_i, q_j$ )      ▷ returns a (sequence, structure) pair
2:    $backpointer \leftarrow back[X, q_i, q_j]$ 
3:   if  $index(q_j) - index(q_i) = 3$  then      ▷  $index(q)$ : the string index of state  $q$ 
4:     return ANYPATH( $q_i, q_j$ ), "... "      ▷  $S \xrightarrow{0} N N N$ ; any  $q_i \rightsquigarrow q_j$  path is fine
5:   if  $length(backpointer) = 4$  then      ▷ pairing:  $P \xrightarrow{-3} C S G | \dots$ 
6:      $a, q_{i+1}, q_{j-1}, b \leftarrow backpointer$       ▷  $q_i \xrightarrow{a} q_{i+1} \xrightarrow{seq} q_{j-1} \xrightarrow{b} q_j$ 
7:      $seq, struct \leftarrow BACKTRACE(S, q_{i+1}, q_{j-1})$ 
8:     return  $a + seq + b, "(" + struct + ")"$ 
9:   else if  $length(backpointer) = 2$  then      ▷ skip:  $S \xrightarrow{0} S N$ 
10:     $q_{j-1}, b \leftarrow backpointer$       ▷  $q_i \xrightarrow{seq} q_{j-1} \xrightarrow{b} q_j$ 
11:     $seq, struct \leftarrow BACKTRACE(S, q_i, q_{j-1})$ 
12:    return  $seq + b, struct + ". "$ 
13:   else      ▷ bifurcation:  $S \xrightarrow{0} S P$ 
14:     $q_k \leftarrow backpointer$       ▷  $q_i \xrightarrow{seq_1} q_k \xrightarrow{seq_2} q_j$ 
15:     $seq_1, struct_1 \leftarrow BACKTRACE(S, q_i, q_k)$ 
16:     $seq_2, struct_2 \leftarrow BACKTRACE(P, q_k, q_j)$ 
17:    return  $seq_1 + seq_2, struct_1 + struct_2$ 

1: function BEAMPRUNE( $X, j, b$ )
2:    $cands \leftarrow hash()$       ▷ hash table: from  $q_i$  to score  $best[S, q_0, q_i] + best[X, q_i, q_j]$ 
3:   for each  $q_j \in nodes(j)$  do
4:     for each key ( $X, q_i, q_j$ )  $\in best$  do
5:        $cands[q_i] \leftarrow best[S, q_0, q_i] + best[X, q_i, q_j]$       ▷  $best[S, q_0, q_i]$  as prefix score
6:      $cands \leftarrow SELECTTOPB(cands, b)$       ▷ select top- $b$  by score
7:     for each key ( $X, q_i, q_j$ )  $\in best$  do
8:       if key  $q_i$  not in cands then
9:         delete ( $X, q_i, q_j$ ) in best      ▷ prune out low-scoring states

```

Supplementary Figure 3: The pseudocode for UPDATE, BACKTRACE (used in BOTTOMUPDESIGN, see [Supplementary Figure 2](#)) and BEAMPRUNE (used in LINEARDESIGN, see [Supplementary Figure 4](#)) functions.

```

1: function LINEARDESIGN( $\mathbf{p}, \lambda, b$ )                                     ▷  $b = \infty$  means exact search
10: for  $j = 4 \dots n$  do
11:   for each  $q_{j-1} \in \text{nodes}(D, j-1)$  do
12:     for each  $q_i$  such that  $(S, q_i, q_{j-1}) \in \text{best}$  do
13:       for each  $q_{j-1} \xrightarrow{b:w_b} q_j \in \text{out\_edges}(D, q_{j-1})$  do
14:         UPDATE( $S, q_i, q_j, \text{best}[q_i, q_{j-1}] + \lambda w_b, (q_{j-1}, b)$ )
15:         for each  $q_{i-1} \xrightarrow{a:w_a} q_i \in \text{in\_edges}(D, q_i)$  do
16:           if  $\Delta G(a, b) < 0$  then
17:              $\text{score} \leftarrow \text{best}[S, q_i, q_{j-1}] + \lambda(w_a + w_b) + \Delta G(a, b)$ 
18:             UPDATE( $P, q_{i-1}, q_j, \text{score}, (a, q_i, q_{j-1}, b)$ )
19:           if  $b \neq \infty$  then BEAMPRUNE( $P, j, b$ )
20:         for each  $q_j \in \text{nodes}(D, j)$  do
21:           for each  $q_i$  such that  $(P, q_i, q_j) \in \text{best}$  do
22:             for each  $q_k$  such that  $(S, q_k, q_i) \in \text{best}$  do
23:                $\text{score} \leftarrow \text{best}[S, q_k, q_i] + \text{best}[P, q_i, q_j]$ 
24:               UPDATE( $S, q_k, q_j, \text{score}, q_i$ )
25:             if  $b \neq \infty$  then BEAMPRUNE( $S, j, b$ )
26:   return  $\text{best}[S, q_0, q_n], \text{BACKTRACE}(S, q_0, q_n)$ 

```

Supplementary Figure 4: The pseudocode of (simplified) LinearDesign algorithm for the joint optimization between stability and codon optimality. The costs in purple are for CAI integration. The first 9 lines are the same as in BOTTOMUPDESIGN (see Supplementary Figure 2). See Methods §1.6 for more algorithm description, and Supplementary Figure 3 for UPDATE, BACKTRACE, and BEAMPRUNE functions.

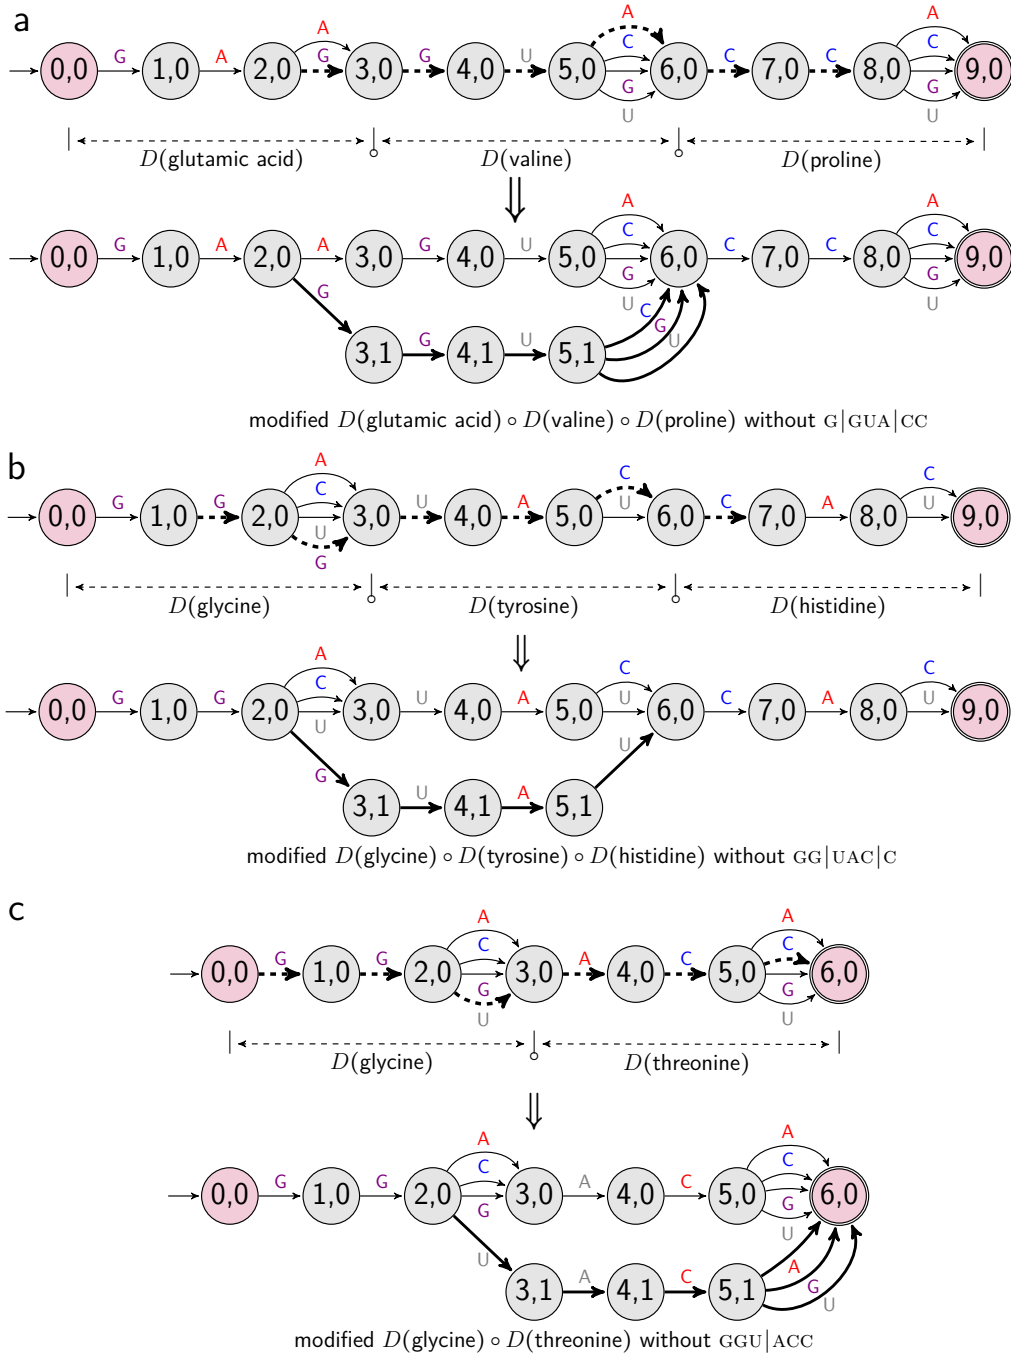

Supplementary Figure 5: Avoiding a restriction enzyme-specific recognition sequence (KpnI restriction enzyme recognition site: GGUACC). The enzyme recognition sequence is beyond one codon. **a–c** show three different partitions that split the sequence into different codons.

**a** our representation of leucine with CAI integrated  
(weighted DFA)

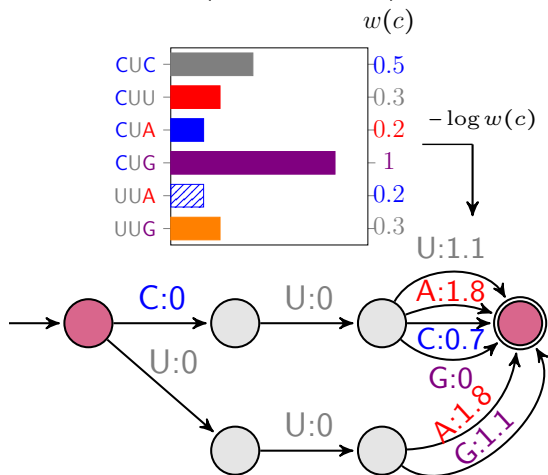

**b** CDSfold's representation of leucines  
(extended nucleotides)

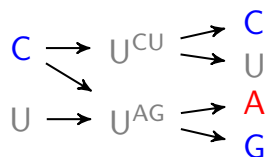

**c** CDSfold's issue for joint optimization

| codon      | $w(c)$ |
|------------|--------|
| $CU^{CU}C$ | 0.5    |
| $CU^{CU}U$ | 0.3    |
| $CU^{AG}A$ | 0.2    |
| $CU^{AG}G$ | 1.0    |
| $UU^{AG}A$ | 0.2    |
| $UU^{AG}G$ | 0.3    |

irreconcilable ratios

Supplementary Figure 6: In our DFA representation, it is easy to encode CAI; by contrast, this CAI integration is impossible or would require substantial revisions under CDSfold's representation. **a**, The weighted DFA of leucine, integrating each codon's (the logarithm of) CAI into edges. **b**, CDSfold's representation of leucine. **c**, The "extended nucleotides" representation of CDSfold is impossible to be extended to do such joint optimization, since the CAI is not integratable in their representation. For example, all six codons of leucine share the same second position (U), but it is classified into two different U's, denoted as  $U^{AG}$  and  $U^{CU}$ , to handle the dependencies between the first and the third positions in the six codons. In such a representation of leucine, the codons  $CU^{AG}A$  and  $UU^{AG}A$  share the same A at the last position, and the codons  $CU^{AG}G$  and  $UU^{AG}G$  share the same G at the last position. The codon CAIs (i.e.,  $w(c)$ ) of  $CU^{AG}A$  and  $CU^{AG}G$  are 0.2 and 1, respectively; while the codon CAIs of  $UU^{AG}A$  and  $UU^{AG}G$  are 0.2 and 0.3, respectively. The difference between the two CAI ratios (0.2:1 vs. 0.2:0.3) is irreconcilable, thus there is no way to reflect such a difference in this extended nucleotides representation. The case of arginine is similar. Therefore, even if CDSfold were to use our objective, it is still fundamentally impossible to be extended to do joint optimization.



**a representations of alternative codons (leucine)**

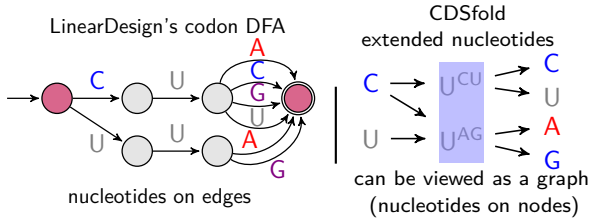

**b space and time analyses (Nussinov Model)**

|              | # of items                                                   | # of items stored | # of items generated | bifur. pair. |
|--------------|--------------------------------------------------------------|-------------------|----------------------|--------------|
| RNA folding  | $(i, j)$<br>$0 \leq i < j \leq n$                            | $n^2$             | $n^3$                | $n^2$        |
| LinearDesign | $q_i \in \{(i, 0), (i, 1)\}$<br>$q_j \in \{(j, 0), (j, 1)\}$ | $4n^2$            | $8n^3$               | $36n^2$      |
| CDSfold      | $(i, j, nuc_i, nuc_j)$<br>$nuc_i, nuc_j \in \{A, U, C, G\}$  | $16n^2$           | $128n^3$             | $64n^2$      |

**c # of items LinearDesign generates (worst case)**

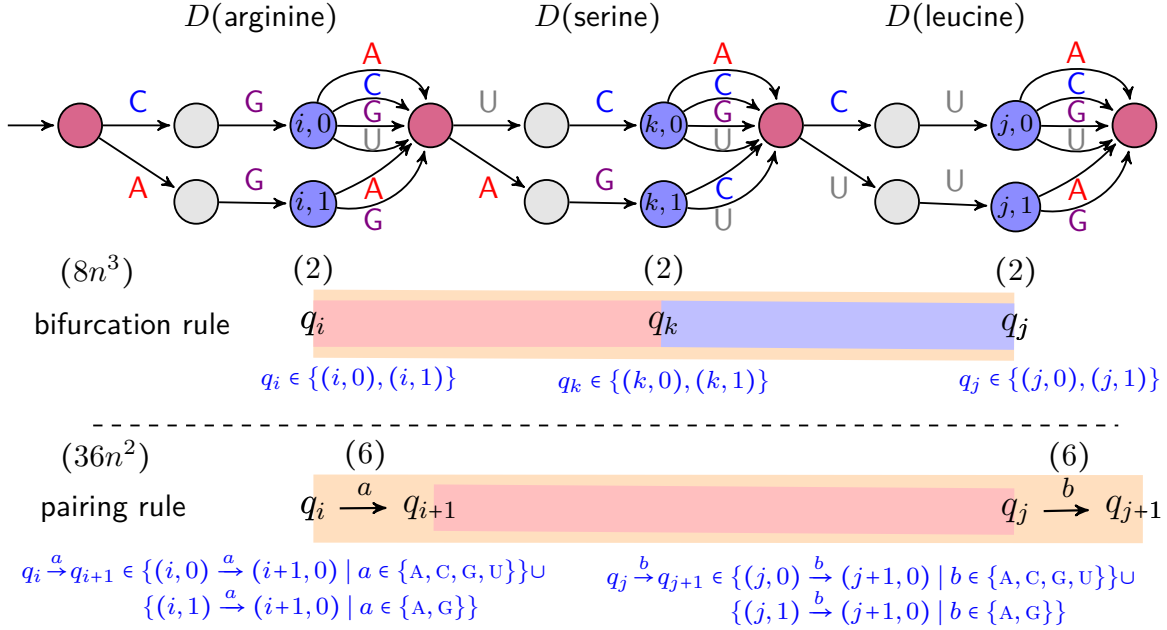

**d # of items CDSfold generates (worst case)**

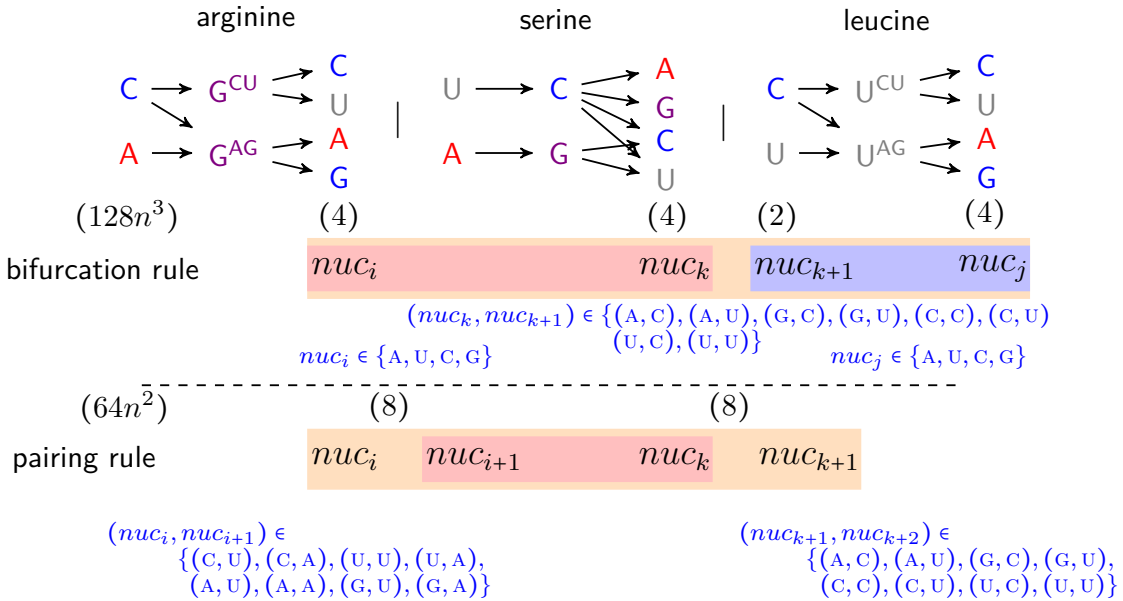

Supplementary Figure 7: Complexity comparison between CDSfold and LinearDesign. **a**, representation of leucine in LinearDesign and CDSfold. **b**, storage and time analyses. LinearDesign's cubic-time bifurcation rule is so efficient that it is dominated by the quadratic-time pairing rule in practice. See **c-d** for details. **c-d**, number of items generated analyses of bifurcation and pairing rules.

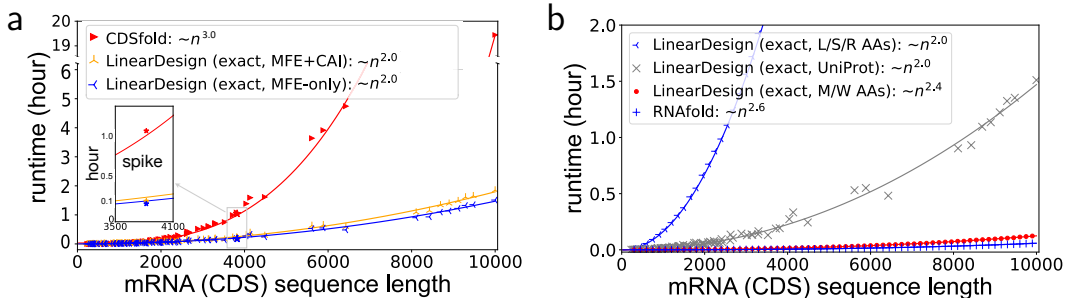

Supplementary Figure 8: Additional time complexity analysis. **a**, Runtime comparison between LinearDesign and CDSfold on UniProt proteins. Overall, LinearDesign is substantially faster than CDSfold, and more importantly, LinearDesign scales quadratically with sequence length in practice, while CDSfold runs in super-cubic time empirically. This difference can be explained by the analysis in **b**. On the other hand, our MFE+CAI mode (with  $\lambda = 3$ ) is only slightly slower than our MFE-only version, while CDSfold cannot jointly optimize MFE and CAI. **b**, Runtime comparison of LinearDesign on proteins composed completely of amino acids with the most (i.e. 6) synonymous codons, natural (UniProt) proteins, and composed entirely of unambiguous (1-codon) amino acids, the last of which is equivalent to single sequence folding. We also ran RNAfold on RNA sequences that encode the unambiguous amino acids. See also Fig. 3 for more *in silico* results of LinearDesign, and [Supplementary Table 1](#) for sequences used in runtime benchmarking.

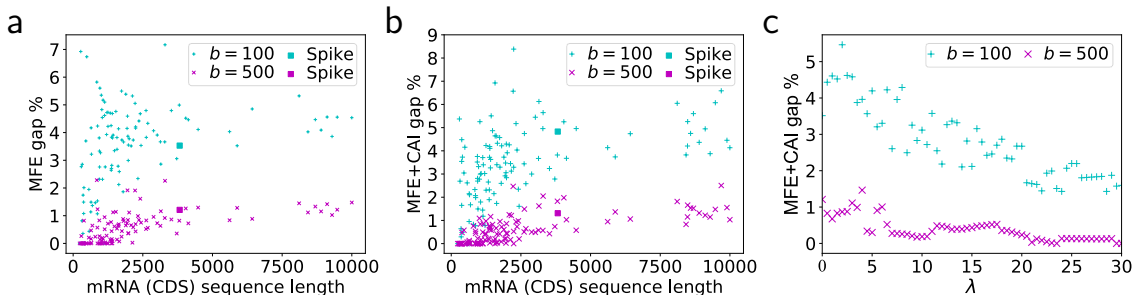

Supplementary Figure 9: Search error of LinearDesign's beam search mode against sequence length and  $\lambda$  (the weight of CAI in the joint optimization). **a–b**, Search error is relatively small, and does not deteriorate with sequence length. Here we used beam sizes 500 (purple) and 100 (cyan), on UniProt proteins (crosses) and SARS-CoV-2 Spike protein (squares), and we use  $\lambda = 3$  for **b**. **c**, Search error decreases with  $\lambda$ . Note that the search error in **a** is the free energy gap % for  $\lambda = 0$ , defined as  $1 - \text{MFE}(\mathbf{r}_{\text{approx\_design}})/\text{MFE}(\mathbf{r}_{\text{exact\_design}})$ ; the search error in **b–c** is defined as  $1 - \text{MFECAI}_\lambda(\mathbf{r}_{\text{approx\_design}})/\text{MFECAI}_\lambda(\mathbf{r}_{\text{exact\_design}})$ , where  $\mathbf{r}_{\text{approx\_design}}$  and  $\mathbf{r}_{\text{exact\_design}}$  are designed mRNAs from the beam search mode and the exact search mode, respectively. See also Fig. 3 for more *in silico* results, and [Supplementary Table 1](#) for sequences used in these analyses.

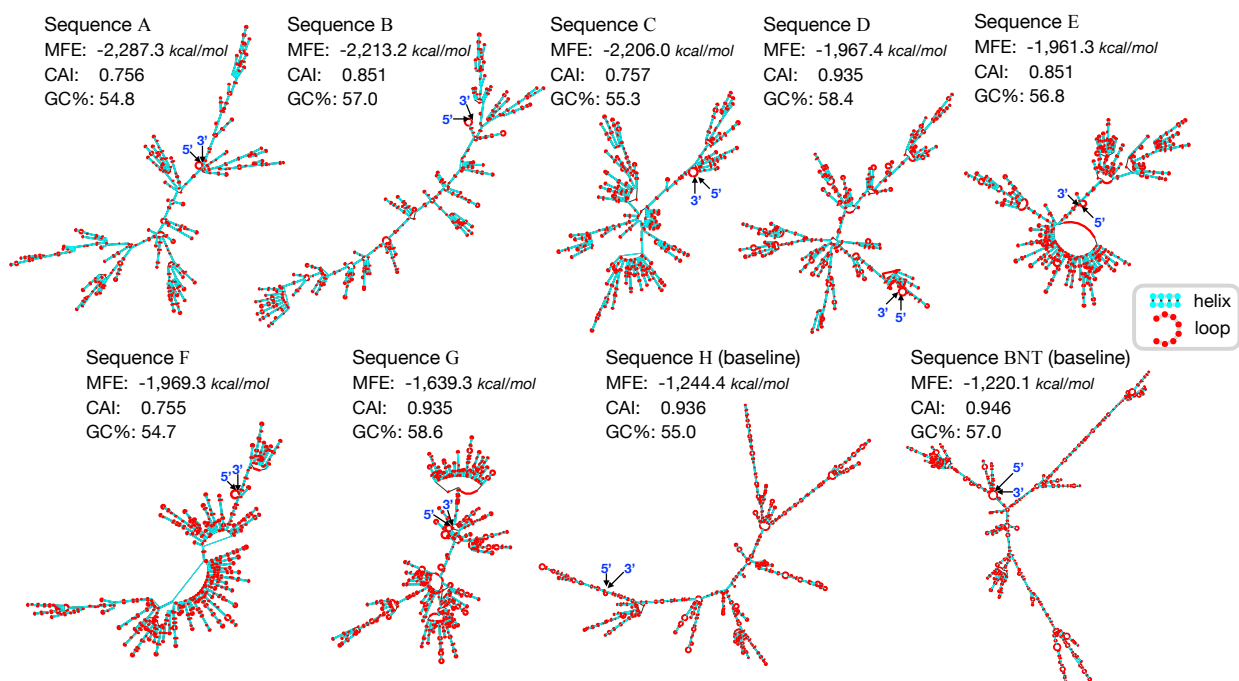

Supplementary Figure 10: The secondary structures of LinearDesign-generated sequences (A–G), and the baseline sequences (H and BNT) used in the COVID-19 wet lab experiments. The stable helices are in cyan and unstable loops are in red. Sequences A–D clearly have less and smaller loops, and they have higher levels of antibody responses compared to the baseline H (see Fig. 4e–g). The secondary structures are predicted by Vienna RNAfold (-d0 mode) and visualized by RNAplot.

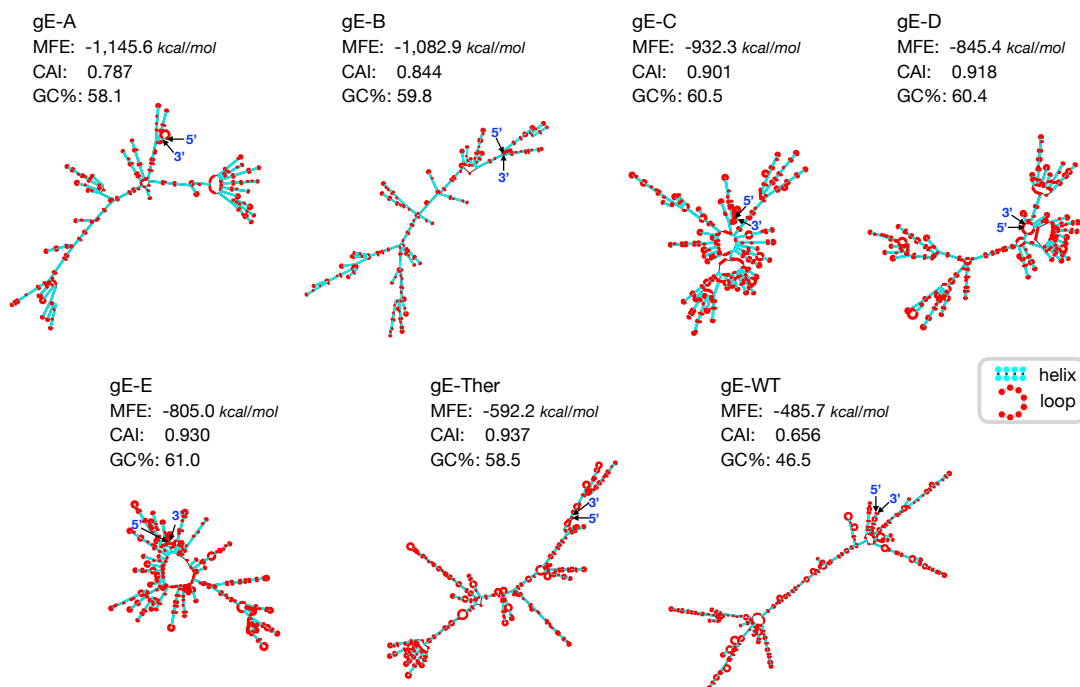

Supplementary Figure 11: The secondary structures of LinearDesign-generated sequences (gE A–E) and the baseline sequences (gE-Ther and WT) used in the VZV wet lab experiments. The stable helices are in cyan and unstable loops are in red. The secondary structures are predicted by Vienna RNAfold (-d0 mode) and visualized by RNAplot.

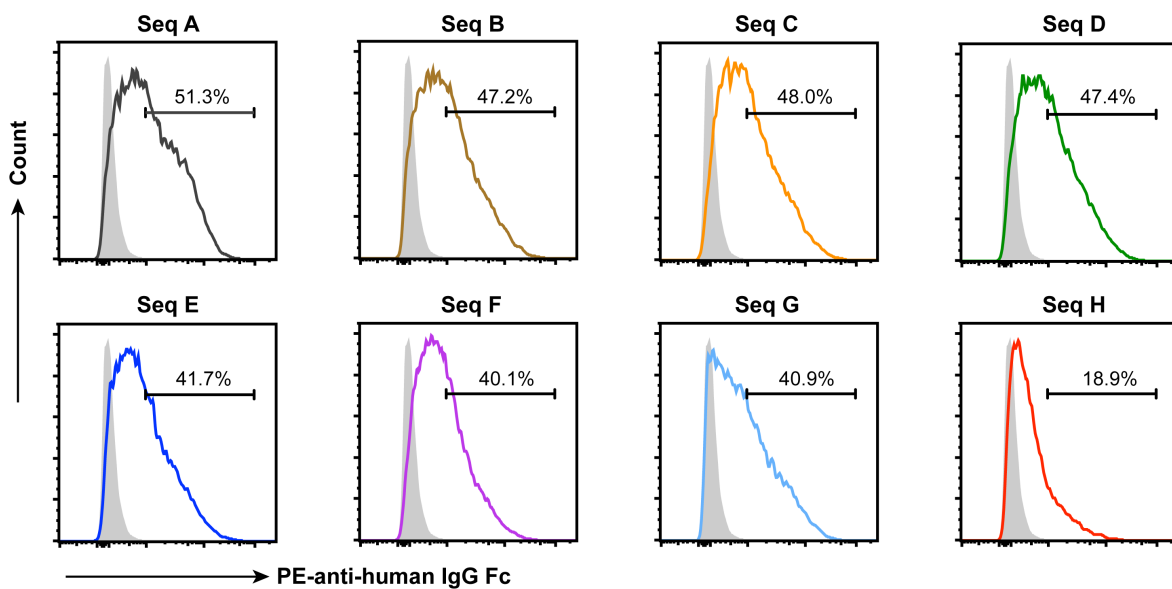

Supplementary Figure 12: Protein expression of Spike mRNAs in HEK293 cells. mRNAs were transfected into HEK293 cells and cells were harvested after 48 hours of incubation. Representative histograms show the surface expression of Spike antigen. Gray histogram represents cells stained by secondary antibody only (negative control).

| UniProt<br>ID | protein<br>length | UniProt<br>ID | protein<br>length | UniProt<br>ID | protein<br>length | UniProt<br>ID | protein<br>length |
|---------------|-------------------|---------------|-------------------|---------------|-------------------|---------------|-------------------|
| P15421        | 78                | Q6PF06        | 316               | Q86TJ5        | 538               | Q6UXY8        | 1006              |
| P13501        | 91                | Q13155        | 320               | P07947        | 543               | Q6ZRS4        | 1044              |
| Q99525        | 98                | Q9BYB4        | 327               | P40222        | 546               | Q8IZA0        | 1049              |
| P31949        | 105               | P78382        | 337               | Q494X3        | 552               | O75151        | 1096              |
| POCE72        | 109               | A6NFE2        | 343               | Q5T749        | 579               | O60721        | 1099              |
| POCL80        | 117               | P47211        | 349               | Q8N1G4        | 583               | Q15147        | 1175              |
| P01707        | 119               | Q3MIR4        | 351               | Q9HA90        | 598               | P54098        | 1239              |
| O95867        | 125               | Q9BY21        | 358               | Q8N6Q8        | 603               | Q6VMQ6        | 1270              |
| Q9GZQ8        | 125               | Q8TDG2        | 376               | P31645        | 630               | Q5TZJ5        | 1347              |
| Q8NC38        | 126               | P01860        | 377               | Q6PI48        | 645               | Q96HA7        | 1378              |
| P15382        | 129               | Q96DV4        | 380               | Q9UNN5        | 650               | Q5VVS8        | 1495              |
| Q9NV29        | 134               | Q16690        | 384               | O75509        | 655               | P51805        | 1871              |
| O14880        | 152               | Q92734        | 400               | Q06187        | 659               | K4DIA1        | 1962              |
| P54852        | 163               | A6NKF1        | 404               | P05160        | 661               | A7TUB1        | 2142              |
| Q14442        | 188               | Q5VV16        | 416               | Q7Z340        | 670               | E7EVM7        | 2703              |
| Q15669        | 191               | P15086        | 417               | Q9H461        | 694               | Q75N90        | 2809              |
| Q9HAE3        | 211               | Q9BY11        | 444               | Q92542        | 709               | B2RWP4        | 2826              |
| Q7RTU1        | 214               | Q5SWX8        | 454               | Q96NI6        | 719               | Q9NR99        | 2828              |
| Q5T7N8        | 215               | Q6NT16        | 456               | P78563        | 741               | P50851        | 2863              |
| P49755        | 219               | Q05901        | 458               | Q9EXB4        | 747               | Q3L8U1        | 2897              |
| P98173        | 230               | Q9NWZ3        | 460               | Q9UFB7        | 747               | Q59FF8        | 2966              |
| P26436        | 265               | Q15465        | 462               | Q9UKQ2        | 775               | H9A532        | 3038              |
| P78345        | 283               | Q9Y512        | 469               | Q9HCI6        | 787               | O75962        | 3097              |
| P57076        | 290               | Q6B0B8        | 471               | C9J798        | 803               | Q96L91        | 3159              |
| A6NH11        | 291               | Q9UBM8        | 478               | Q9QC07        | 812               | Q6ZRS2        | 3230              |
| P30281        | 292               | P47974        | 494               | Q9H3R1        | 872               | Q96JQ0        | 3298              |
| Q8NH43        | 312               | Q8IW19        | 511               | Q8TF61        | 875               | Q16787        | 3333              |
| Q9HC38        | 313               | Q8TAA9        | 524               | Q8NB90        | 893               |               |                   |
| Q8NGJ5        | 315               | Q13087        | 525               | Q9Y5G9        | 962               |               |                   |

Supplementary Table 1: Protein sequences used for runtime benchmarking in Fig. 3 and [Supplementary Figure 8](#), and search error analysis in [Supplementary Figure 9](#).

| design | MFE<br>( <i>kcal/mol</i> ) | CAI   | GC%  | U%   | Molecular<br>weight | Mobi. shift<br>relat. dist. | Mg <sup>2+</sup> = 10 <i>mM</i><br>half-life(h) | <i>K</i> (10 <sup>-2</sup> ) | Mg <sup>2+</sup> = 20 <i>mM</i><br>half-life(h) | <i>K</i> (10 <sup>-2</sup> ) | Protein<br>expr. (MFI) | BAb<br>titers | NAb<br>titers | IFN- $\gamma$ +<br>T cells |
|--------|----------------------------|-------|------|------|---------------------|-----------------------------|-------------------------------------------------|------------------------------|-------------------------------------------------|------------------------------|------------------------|---------------|---------------|----------------------------|
| A      | -2,287.3                   | 0.756 | 54.8 | 22.7 | 1,229,541           | <b>3.20</b>                 | <b>20.0</b>                                     | 3.46                         | <b>12.6</b>                                     | 5.52                         | <b>6,837</b>           | 11,404        | 217.9         | <b>130.0</b>               |
| B      | -2,213.2                   | 0.851 | 57.0 | 20.8 | 1,229,943           | 3.00                        | 17.1                                            | 4.06                         | 8.9                                             | 7.83                         | 5,328                  | 8,063         | 231.5         | 63.8                       |
| C      | -2,206.0                   | 0.757 | 55.3 | 22.2 | 1,230,380           | 2.97                        | 11.1                                            | 6.25                         | 7.2                                             | 9.58                         | 5,939                  | <b>18,102</b> | <b>496.4</b>  | 98.5                       |
| D      | -1,967.4                   | 0.935 | 58.4 | 19.1 | 1,229,927           | 2.80                        | 5.4                                             | 1.29                         | 6.5                                             | 1.07                         | 6,801                  | 8,063         | 221.1         | 79.7                       |
| E      | -1,961.3                   | 0.851 | 56.8 | 21.1 | 1,229,328           | 2.72                        | 5.5                                             | 1.26                         | 6.4                                             | 1.09                         | 4,499                  | 2,540         | 68.2          | 52.7                       |
| F      | -1,969.3                   | 0.755 | 54.7 | 23.0 | 1,230,153           | 2.75                        | 6.5                                             | 1.06                         | 6.1                                             | 1.14                         | 2,973                  | 6,400         | 187.5         | 64.5                       |
| G      | -1,639.3                   | 0.935 | 58.6 | 18.9 | 1,229,526           | 2.50                        | 5.4                                             | 1.28                         | 4.8                                             | 1.45                         | 6,446                  | 2,851         | 64.0          | 70.5                       |
| H      | -1,244.4                   | 0.936 | 55.0 | 21.2 | 1,228,180           | 2.20                        | 3.9                                             | 1.78                         | 3.3                                             | 2.12                         | 4,491                  | 141           | 24.4          | 22.3                       |

Supplementary Table 2: Detailed computational and experimental data for the 8 designs of COVID-19 mRNA vaccine. MFI: mean fluorescence intensity. See [Supplementary Figure 10](#) for their secondary structures.

| design  | MFE<br>( <i>kcal/mol</i> ) | CAI   | GC%  | U%   | Molecular<br>weight | Mg <sup>2+</sup> = 10 <i>mM</i><br>half-life(h) <i>K</i> (10 <sup>-2</sup> ) | Mg <sup>2+</sup> = 20 <i>mM</i><br>half-life(h) <i>K</i> (10 <sup>-2</sup> ) | Protein expr. (MFI)<br>(24h) (48h) | anti-gE IgG<br>(Reciprocal titer) |
|---------|----------------------------|-------|------|------|---------------------|------------------------------------------------------------------------------|------------------------------------------------------------------------------|------------------------------------|-----------------------------------|
| gE-A    | -1,145.6                   | 0.787 | 58.1 | 20.1 | 602,907             | 66.5 1.04                                                                    | 50.7 1.37                                                                    | 7,886 3,220                        | 16,890                            |
| gE-B    | -1,082.9                   | 0.844 | 59.8 | 18.8 | 602,330             | 39.1 1.78                                                                    | 18.7 3.72                                                                    | 19,736 10,632                      | 77,605                            |
| gE-C    | -932.3                     | 0.901 | 60.5 | 17.2 | 603,570             | 22.2 3.12                                                                    | 9.5 7.32                                                                     | 20,950 11,585                      | 67,559                            |
| gE-D    | -845.4                     | 0.918 | 60.4 | 16.9 | 602,793             | 14.0 4.96                                                                    | 7.9 8.74                                                                     | 22,457 13,098                      | 22,286                            |
| gE-E    | -805.0                     | 0.930 | 61.0 | 16.3 | 602,478             | 12.1 5.71                                                                    | 7.4 9.42                                                                     | 23,246 4,958                       | 44,572                            |
| gE-Ther | -592.2                     | 0.937 | 58.5 | 17.4 | 602,225             | 10.9 6.35                                                                    | 5.9 1.18                                                                     | 9,257 2,457                        | 9,701                             |
| gE-WT   | -485.7                     | 0.656 | 46.5 | 25.5 | 601,951             | 10.8 6.41                                                                    | 6.0 1.15                                                                     | 758 777                            | 35                                |

Supplementary Table 3: Detailed computational and experimental data for 7 sequences of VZV mRNA vaccine. Chemical stability of mRNAs upon incubation in buffer at 37 °C. MFI: mean fluorescence intensity. See [Supplementary Figure 11](#) for their secondary structures.

# Supplementary Sequence Information

## Sequences used in COVID mRNA vaccine experiments

The mRNA sequences (coding region) used in the COVID mRNA vaccine experiments are listed below (stop codons not included). Sequences A–G are our designed mRNA sequences, H is the baseline sequence designed by conventional codon optimization method, and BNT is another baseline sequence from BioNTech/Pfizer COVID-19 vaccine (without “2P” mutations). In the experiments, we use two stop codons UAAUAG for all sequences.

>Sequence A: (MFE -2287.3 kcal/mol, CAI 0.756)

```
AUGUUCGUAUUCUUAGUGUCUCCUGCCCCUGGUGUCCAGCCAGUGCGUGAACCUUACCCCGGACCCAGUUGCCCCCGGUAUACGAACUCGUUUACGGGGGGG  
GUAUAUCCGGUAUAGGUGUUCGGAGCUCGGUUCUCCAUAUCAAUCAGGACCCUUCUCCCGUUCUUCUCCAACGUGACAUGGUUCCAUGCCAUAUCAGUUUCGG  
GGACGAACGGGACGAAGAGGUUCGACAACCCCGUGUUGCCUUAACAGCGGGGUGUACUUCGCCUCGACGGAGAAGAGCAACAUAUACGGGUUGGAUCUUUGG  
ACCACGUUGGAUAGCAAGACACAGUCAUUGUUAUUGUGAACAAGUUCACCAACGUGGUUAUAAAGGUCUGUGAGUUCAGUUCUGUAUAGACCCUUCGGGGG  
CUAAUUAACCAAGAACAACAAGUCAUGGAUGGAGAGCGAGUUCGGGUGUACUCGAGUGCAAACAUAUGCACUUUCGAGUACGUGUCCAGCCAUAUCUGAUG  
UCGAAGGUAAGCAGGGGAACUUAAGAUCUGCGAGAGUUUGUUAAGAACAUAAGCAGGUAUCUUAAGAUAUACAGUAAGCACACCCGAUCAACUUGGUGCGG  
GACUUUACCCAGGGUUCACGCGCCUGGAGCCGUGGAGCUCUGCGAUAGGCAUCAACAUCACGCGGUUCCAGACGCGUGCGGCCUGCACCCGUGCUACCCUCAC  
CCCGGGGACUCUUCUCCGGGUGGACGCGCCGUGCAGCGGCUAUAUGUAGGGUACUUCGACGCCACGCACGUUCUUGUUAAGUAACAACGAGAACGGCAACAUA  
CGGACGCGUGGAUUGUGCGUUGGAUCCGUUUCGGAGACAAAGUGUACACUGAAGAGCUUACCGUGGAGAAGGGCAUCUACCAGACGUCCAUCUACGGGUGCAG  
CCGACCGAGUCGAUUGUGCGCUUCCCAUAUACACAACACCGUGUCCUUGGGGAAGUGUUAACGCGACUCGGUUCGCUACAGUACCGUUGGAACCGAAAGCG  
GAUCUCCAACUGCGUGGCGUACUACAGCGUGCUACAACAGUGCGUGUUAGCAGCUUAAGUGCUAUGGGGUGAGUCCACCAAGUUGAACGACCUCUGCUUCA  
CCAACGUCUACGCGGAUAGCUUCGUUAUCCGCGGAGACGAGGUGAGGCGAGAUCGCUCCCGGUCAGACCGGGAAGAUCCGGGACUACAACUACAAGUUGCCGGACG  
UUUACGGGUGUGUUAUUGCUUGGAUAUAGCAAUAACCUAGCUCGAAAGUCGGAGGUAUUUAACAAUACCUUACAGACUGUUCGGAAAAGCAAUCUGAAGCCUU  
CGAGCGUGAUUAUUCUACCGAGAUUAUACAGGUGGAUCCACCCGUGCAACGGGUGGAGGGCUCAAUUGCUACUUUCGUUACAGUCGUACGGCUCCAGCCCA  
CCAACGGGUGGGUACACGCGUACCGGUGGUGGUCUACGCUUUGAGCUCUCCACGCGCGGCAACUGUAUGUGGCCGAAGAAGUCGACGAACUUGGUGAAG  
AACAGUGCGUCAACUUAACUUAACGGUCUGACCGGACGGGGUGCUUACUGAGUCUACAAGAAGUUCUCCUCCAACAGUUUGAAGGGACAUCGCCGA  
UACUACAGACGCGUUCGGGAUCCCCAGACCCUGGAGAUCCUGGACAUCACGCCUGUAGUUUCGGCGGUGUGUCUUUAUACCCUUGGACGAACCCUCCAAC  
AGGUGCGGUGUGUUAUCAGGACGUGAAUUGCACCGAGGUGCCGGUGGCAAUUCACGCUAUCAGCUGACCCACCUGGCGUGUAUAUAGUACAGGCUCAACGUG  
UUUCAGACAGCUGCGUGGUGCCUGAUUGGCGCGAGCAGGUAUAACUCGUACGAGUGCGACAUCCGAUCCGCGCGGGGAUUUGUGCGUACAGACGCGAGC  
CAAUUCGCCGCGCGAGCUGGAGUUGCCUCCAGAGCAUCAUCGCCUACACGAUAGCCUGGGAGCGGAGAAUUCAGUGCGUAUAGCAAUAACUUAUUGCUA  
UACCCAGAAUUUACCAUCUCCGUGACAACGGAGAUUCUGCCGGUGUCUAGACCAAGACAUCGGUAGACUGUACUUAUGUACAUCUGCGGCGACAGUACUGAGUG  
AGUAACCUUGUGCUGCAGUAUUGGAGUUUUUGUACCCAGCUCUACCCGCGCCUGACUGGGAUCGCGGUGAGCAGGACAAGAACAACCCAGGAGGUGUUCGCCAGG  
GAAGCAGAUUAACAAGACGCCCCGAUCAAGGACUUCGGGGGCUCAAUUUCUCGAGAUUCUCCCGGAUCCGUAACAAGCCGAGCAAGAGGUCUUUAUUGAGGACC  
UCUUGUUAACAAGGUGACUUUGCGGAUGCGGCUUCAUAAGCAGUACGGUGACUGCCUGGGUGAUUUGCUGCGCGGAUCUGAUUUUGCGCGCAGAAGUUAAC  
GGGCUACCCGUGCUGCCUCCUGCUUACCGAGAGAUAGCGCAGUACACCUUCGCGCUGUUGGCGGGACAUAUCAGGUCUGGACCUUCGGGGCAGGAGC  
AGCACUCCAGAUCCCGUUCGGAUGCAGAUUGCGUAUCGUUCAACGGGAUCGGAGUGACCCAGAACGUACUCUUAUGAGAAUCAGAAGCUGAUCGCCAACAGUUA  
ACUCAGCUAUUGGCAAGAUAUCCAGGACAGCUUUGCCAGCAGCGCCUCCGCGUGGGCAAGCUCAGGAGUUGUCAAUCAGAACGCACAAGCGUUGAAUACGCUUG  
AAGCAGCUGAGUUCGAAUCUUCGGGGGAUCAGCUCUGUUCUACAACGACAUCUUCGCGGCUAGUAUAGGUGGAGGCGGAGUUCAGAUACCGGUGUAUACCGG  
UCGAUUGCAGAGCCUCCAGACCUACGUAACUCAGCAGCUACUAGAGCUGCUGAGAUACGGGCCUCCGCAAUUCUAGCCGCAAAAGAUUGCGGAGUGCUUCUG  
GUCAGUCCAAGCGGGUGGACUUCUGCGGAAGGGCUAUAACCUAGUUGUCCUCCCGAGUCCGCCCGCAUGGAGUAGUUGUUUUAACGUCACUUUAUGUACCGGCU  
CAGGAGAAGAACUACAGCUGCGCCUGCCAUCUGCCAUGAUGGCAAGGGCAUUUCCUUGGUAAGGGGUCUUCGUCAGCAACGGGACCCACUGGUUCGUCACGCA  
GCGCAACUUCUUAUGAGCCCAAGUAUUUACCAUGACAUAUACCUUUGUCAGUGGUAACUGGACGUGGUAUAGGGUACUGGAACAACACUUGUUUACGAUCCGCUCC  
AGCCAGAGCUUGACAGCUUAAGGAGGAGCUGGACAAGUACUUAAGAUAUACUUCUCCAGAGUUGAUCUGGAGACAUCUCCGGGAUCAACGCUUCUGUAGUG  
AACAUACAGAAGGAGAUACAGGCUAAUAGGUGUCCAAGAACCUCACAGAGGCCUGAUCGAUUCUCCAGGAGCUGGGGAAGUAUAGCAGUAUAUCAAGUGGCC  
UUGGUAUAUCUGGCGGGGUUAUCGCGGGGCUAUAAGCAUCGUAUGGUCACGAUCAUUGUUGCUGCAUGACGUCCUGCAGCUGCCUGAAGGGCUGCUGCA  
GCUGUGGGUCCUGUUGCAAGUUGACGAAGACGAUUCUGAGCCGGUGCUGAAGGGCGUGAAGUUAACUACACC
```

>Sequence B: (MFE -2213.2 kcal/mol, CAI 0.851)

AUGUUUGUAUUUUUUGUGUGUGUCCUCCCGUGUACUCCAGUGCGUGAACCCUGACGACAGAACCCAGCUGCGCCGACGUAACCAACAGCUUCACUCGGGGUGU  
GUAUUUACCCCGACAAGGUGUUCAGGUCCAGCGUGUGCAGCAGCAGCAGGACCCUGUUCUCCGUGUUCUCCAACGUGACAUGGUUCCAUGCCAUAUCAGUGUCUG  
GGACCAUUGGUUACGAAGCGCUUCGACAACCCGGUGUUGCCUUAACGAUGGGGUGUACUUCGCCUCAACGGAGAAGGAACAUAUCCAGGGGUGUAUCUUCGGG  
ACCACCCUCGACAGCAAGACUCAGAGCUUGCUAUCGUGAACAAACGCCACUAAUGUGGUGUAUCAAGGUGUGCGAGUCCAGUUUGCAAUGACCCGUUCCUGGGGGU  
GUACUAUCAUAAGAAUAACAAGUCCUGGAGGAGUGAGUUCGGGUGUACUCGAGUGCAAACAUAUGCACUUUCGAGUAUGUCAGUCAGCCUUCUGAUGGAUC  
UGGAGGGGAAGCAGGGGAACUUAAGAACCUGCGAGAGUUCGUGUUAAGAACAUCGACGGGUAUCUUAAGAUCUAUCCAAGCACACGCCCAUCAAACCCUGUGCGG  
GACUCCCGCAGGGGUUCUCUGCCUGGAGCCUCUGGGGACCCUGCCUAUUGGCAUCAACAUCACCCGGUUCAGACGCUCUGGCCUCGACAGGAGCUAUCUGAC  
ACCCGGGUAUCCAGCAGCGGUGGACGGCCGGGGCUGCAGCCUACUACGUGGGUACCCUGCAGCCCGGACCUUCUGCUAAGUAACAACGAGAACGGCAACAUA  
CGGACCGGUGGAUUGUGCCUCGACCCUUGAGCGAGACCAAGUGCACCUGAAGAGCUUCACGGUGGAGAAGGGCAUCUACCAGACAAGCAACUUCAGGGUGCAG  
CCAACCGAGUCGAUUGUGCGUUCUCCCAAUAUCACAACACCCUGUGUCCUUGGGGAGGUGUUAACCGGACUCGGUUCGCUAGCGUGUACGCAUGGAUAUGGAAGCG  
AAUCAGCAACUGUGUCGUGACUAUUCGUGUGUAACAACAGCGCUAGCUUUAAGCAGUUAACGUGCUACGGGUCUCCCCCAGAAAGCUGAACGUAUCUGUGUUUA  
CUAAUGUGUACGACAGCAGCUUCGUGAACCGGGGAGAGGAGUCCGCCAGAUCCGUCAGGGGACCGGUAAGAUCGCCGACUACAACUAAGUUGCCGGACGAU  
UUUACCCGGGUGCGUGAUUGCUUGAAUAGCAACAACCCUGGACAGCAAGGUGGAGGUAUUACAUAUACCUUACCCGUGUUCAGGAAGUCCAACCUGAAGCCUU  
CGAGAGAGACAUCUCUACGGAGAUCUAUCAGGUGGAUCCACCCGUGCAACGGGUGGAGGGGUUAACUGCUACUUCUCCUCCAGAGCUACGGCUUCAGCCCA  
CCAACGGGGUGGGUACACCGCCUACCGGGUGGUGUGUCUCCUUCGAGCUGCUGCAGCCCCCGCACGGUGUGCGGCCGAAGAAGAGCACAACCCUGGUGAAG  
AAUAAGUGCGUGAACUUUAACUUAACGGGUGACUGGCACCGGCGUCCUGACUGAGAGCAUAAGAAGUUCUGCCAUCUCCAGCAGUUUGGCGAGGACAUUGCUGA  
CACCACGGACCGCUGCCGGAUCCCGAGCCUGGAGAUCCUGGACUACGCAUUGCUUCGGGGGUGAGCGUGAUCACACCCGGAACUAACACCUCCAACC  
AGGUCGCGGUCUUGUACAGGACGUGAACUGCAGGAGGUGCGGUGCUUAACACCGCACAGCUGACCCCCACCCUGGCGGUGUAUUCACCGCGACCAACGUG  
UUCAGACACGUGCGGGUGCCUGAUUGGCGCGAGCAGUGAACAAUUCUUAUGAGUGGACAUCCCAUCGGAGCGGCAUUGCGCUUCGUAACAGACCCAGAC  
CAACUCUCCACGGCGGCCCGGUCAGUGGCCUCCAGAGCAUCAUCGCCUACACGAUGAGCCUGGGCGGAGAAUAGUGGGCGUAUAGCAAUAACUUAUUGCUA  
UACCCACCAACUUCACUAUCUCCGUGACCAAGAGAUACUGCCAGUCAGCAUGACGAAGACGUCUGUUGACUGCACCAUGUAUAUCUGUGGUGAUUACAGUGUC  
AGCAACCCUGCUGCUGCAGUACGGCAGCUUCGACUCAGUUAACAGGGCCUGACCGGGAUCGCCUGGAGCAGGACAAGAACAACGAGGAGGUGUUGCUCAGGU  
CAAGCAGAUUCAAGACACCCCAUCAAGGACUUCGGGGUUAACUUCAGUCAGAUCCUGCCUGACCCAAGCAAGCGGAGCAAGAGGUCUUUAUUGAGGACC  
UCUUGUUAACAAGGUGACGCGUGCGGACGUGGUGUAUCAAGCAGUACGGGACUGCCUGGGGCAUCGCGCGCGAUCUGAUUUGCGCGCAGAAUUAAC  
GGGUCACCCGUGCUGCCCCCUGCUGACCGAUGAGAUAUCGUCAGUACACAGCGCCUUCGUCGUGUAACUUAACAGCGGGUGGACUUCGCGCGUGUGC  
UGCAUUGCAGAUCCUUUUGCAAUGCAGAUUGCGUAACGGUUAACGGCAUUGGGGUGACACAGAACGUGCUGUACGAGAAUCAGAAAGCUGAUCGCCAACAGUUA  
ACUCGGGAUCGGCAAGAUUACAGGACAGCCUGUCCAGCACCGCCUCCGGGGAAGUCCAGGACGUGGUAUUCAGAACGUCACAGGCCUUAUACGUGGUC  
AAGCAGCUGAGCAGAAUUCGGGGCAUCUCGAGCGUUCUGAACGACAUCUUCGUGCGGCGUGUAUAGGUGGAGCGGAGGUGCAGAUCCAGCGGUAUACCGG  
CCGGUUGCAGAGUCGACACCUACGUGACUCAGCAGCUCACAGAGCUGCUGAGAUAGGGCCUCCGCCAAUCUGCCCGGACAAAGAUGUCGAGUGCGUCCUGG  
GGCAGUCCAAGCGGGUGGACUUCUGCGGAAGGGCUAUCACCCUGAUGUCCUCCCGCAGUCCGCCCGCAUGGAGUGGUCUUCUGCACGUGACUUAUGGCCGGG  
CAGGAGAAGAUCUACCAACUGCGCCGGCAUUGUCACGACGGGAAGGCCCAUUCUCCAGGAGGGGUCUUCGUCAGCAACGGGACCCACUGGUUGUGACUCA  
GAGAAACUUCUAGAGCCACAGAUCAUUAACACUGACAUAUACCUUUGUCAGUGGUAUUAUGAGCUGGUGAUCGGGAUCGUGAACAACACUGUUUACGAUCCUUGC  
AGCCCGAGCUGGACAGCUUCAAGGAGGAGCUGGACAAGUACUUAAGAUAUACUUCUCCAGACGUGAUCUCGGAGACUUCUCCGGGAUCAACGCUUCUGGGUG  
AACAUCCAGAAGGAGAUCCAGCGCUAAUGAGGUGGCAAGAACCUCAACGAGAGCCUGAUCGAUUCUCCAGGAGCUGGGGAAGUAUGAGCAGUAUAUAAUGGGCC  
UUGGUAUAUCUGGUCGGGUUCAUUGCAGGGUGAUCGCAUUGGUGACGAUCAUGCUGUGCUGAUGACGUAUCGUCGACGUGCCUGAAGGGGUGCUGCA  
GCUGUGGGUCCUGUUGCAAGUUGACGAGGACGACUCGGAGCCGGUGUGAAGGGGUGAAGCUGCACUACACC

>Sequence C: (MFE -2206.0 kcal/mol, CAI 0.757)

AUGUUUGUUCUUCUAGUGCUGCUGCCCGUGGAGUAGUCAGUGUGUAACCCUGACUACUCGCACCCAGCUGCCCCCGGUAUACGAACUCGUUUACGCGGGGGU  
GUACUACCCGGACAAAGUUGUUCAGGUCCAGCGUGCUUAUAGCACGACGAGGACCCUGUUCUCCCGUUCUUCUCCAACGUGACAUGGUUCCAUGCCAUAUCAGUUUCGG  
GGACAAACGGGACGAAGCGCUUUGACAACUCCGGUGUUGCCUUAACGACGGGUGUACUUCGCCUCGACGGAGAAGGAACAUAUCCGGGUUGGAUAUUCGGA  
ACGACGCGUGGACUGAAGACCCAGUCACUGCUGAUCGUAACAACCGCAGCAAGUAGUAUAAGGUCUGCGAGUUCAGUUCUGUAUAGACCCUUCUGGGGGU  
CUAUUACCAAGAACAACAAGUCCUGGAUGGAGUCGGAGUUCGAGUGUACUCGAGUGCAAACAUAUGCACUUCGAGUACGUUUCUCCAGCCUUCUGAUGGAU  
UAGAAGGGGAAGCAGGGAAACUUAAGAACUUGAGGGAGUUCGUCUUAAGAUAUAGACGGUAUCUUAAGAUCUACUGAAGCACACUCCGAUUAUUCUGUCGGG  
GACUUGCCGACGGGUCACGCGCUCUGGAGCCGUGGGGACUUGCGUAAGGCAUCAACAUCACUCGGUUCAGACGCGUCUGGCCUCGCAUCGUUCUUAUCUAA  
ACCGGGUGACAGCAGCAGCGGUGGACCCCGGAGCAGCGGCUUACUUGGGGUAACCCUGCAGCCCGCAGUUCUUGUUAAGUAACAACGAGAACGGCAGGAUCA  
CCGACCGCGUCGACUGCGCUUGGAUCCGUGUGGAGACAAAGUGCAGCUCUAAAGAGCUUCACGGUAGAGAAGGGCAUCUACAGACCAACUUCGGGUCAG



CCCACGGAGUCGAUUGUGCGCUUCCCCAAUAUCACAAACCUGUGUCCUUUGGGGAAGUGUUAACGCCACGGGUUCGCUAGUGUGUAUGCGUGAAUCGCAAGCG  
CAUUAGCAACUGCGUGGGGAUUAUUCAGUUUUGUACAACUCAGCCUCGUUCAGCAGUUAAGUGCUACGGGGUGAGUCCUACAAAGCUGAAUGACCUCUGCUUCA  
CCAACGUCUACGCGGAUAGCUUCGUUAUCCGCGGGACGAGGUGAGGCAGAUCCGUCGGGGCAGACCGGGAAGAUUGCUGACUACAUAUAAAGCUCGCCGAUGAC  
UUCACCGGGUGCUUUAUGCGUGGAAUUCGAAACAACCUGGACAGCAAGGUAGGAGGUAUUACAUAUACCUCUACCGGCGUUCAGGAAGUCGAAUUUGAAGCCUUU  
UGAGCGGGAUUCUCGACGGAGAUUACCAGGCGUGAAGCACGCCUGCAUUGGAGUGGAAGUUUAACUGUUAUUCCACUCCAGUCGUACGGCUUCCAGCCUA  
CCAACGGGGUAGGGUACCAGCCUAACCGGUUGUGUGUCUCUCCUAGCUGCUCACGCACCGGCCACGGUGUGUGGGCCGAAGAAGAGCACAACUUGGUAAG  
AACAGUGCGUGAACUUAACUUAAUGGGUUGACGGGCACGGGCUUCUGACCGAGUCACAACAAGAAUUCUCCGUUCCAGCAGUUCGGGAGGACAUUCGCGGA  
CACGACGGACGUCUGCCGGAUCCCCAGACCCUGGAGAUCCUGGACAUCACGCCGUGUUCGUUCGGCGGUCUCUGGUAUCACACCUGUACGAACACUUCGAACC  
AGGUGGCCUGUCUACCAAGAUUAAUUGUACGGAGGUUCGGUGGCAUUCACGCUGAUCAGCUUACUCCACCGUGGAGGUGUAUCCACGGGGAGUAAUGUG  
UUCACAGACAGUGCGGGUGCCUGAUUGGCGCCGAGCACGUGAACACUCUUAUGAGUGCGACAUCUCCGAUCGGCGGGGAUUUGUGCGUGUACAGACGCAGAC  
CAAUUCGCCGCGGAGCUCGGAGUGUCGCCUCCAGAGCAUCAUCGCCUACACGAUGAGCCUGGGAGCGGAGAAUUCAGUGCGUUAUGCAAUAACUCUUAUGCUA  
UACCCAGAAUUUAACUACAGCGUGACCACCGAGAUCCUCCAGUCAGCAUGACGAAGACGUCUGUUGACUGCACAAGUUAUCUUGUGGAGACAGCACGGAGUGC  
UCGAACUUUCUGCUGCAGUACGGAUCCUUCUGUACUCAGCUGAAUCGAGCACUCACUGGCAUUGCCGUUGAGCAGGACAAGAACCACCGAGGUGUUUGCCAGGU  
CAAGCAGAUUCAAGACACCUCUAUCAAGGAUUUCGGGGAUUCAACUUCUCCAGAUCCUCCGUAUCCAGUAAACCGAGCAAGAGUCCUUUAUUGAGGACC  
UCUUGUUAACAAGUGACGUCGGGAUGCUGGGUUAUCAAGCAGUACGGUGACUGCCUCGGGAUUAUGCUGCGCGGAUCUGAUUUUGCGCGAGAAGUUAAC  
GGGUCACCCGUGCUGCCGUGUGCAGCGGAGAUAGUCCCAAGUACAGCUCAGCGUUAUUCGGGUAUCGAUCACAUCUGGGUGGACGUUCGGGGCUGGAGC  
CGCGUCCAGAUCCCGUUCGCAUGCAGAUUGCGUAACCGUUUAUUGGGAUCGGGGUGACGCAGAAUGUGCUGUAUGAUAUCAGAAGCUGAUUGCCAAUCAGUUA  
AUUCUGCAUUGGCAAGAUCAGGACAGCUUGCCAGCACGGCCUCCGCGUGGGCAAGCUCAGGAUGUUGCAAUCAGAAUUCUACAGGCGCUAAACCCUCGUU  
AAGCAGCUGAGCAGCAACUUCGGCGCAUCUCCAGCGUCUCAUAGCAUAUUGAGCAGGCGGACAAGGUGAGGCGAAGUGCAGAUCCAGCGGUGAUACCGGG  
GCGUCUGCAGAGCCUGCAGACGUACGUGACUCAGCAGUUAUCCGCGUGCGGAGAUCCGGCGUCCGCAACCUGCGCGGACCAAGAUUGCCGAGUGCGUGCUGG  
GGCAGUCGAAGCGGGUGGACUUCUGCGGGAAGGGCUAUCACCUGAUGUCCUCCCGCAGUCCGCCCGCACGGAGUUGUUUUCUGCACGUGACUUAUGUCCCGGG  
CAGGAGAAGAUCUACAGCUGCCCGCAAUUCUGUCACGACGGGAAGGCCCAUUCUCCGCGUAGGGUGUUUUUGUCUCCAACGGCACCCACUGGUUGUACCCCA  
GAGAAAUUCUUAUGAGCCACAGAUAAUUAACCUGACAAUACCUUUGUAAUGGGUAAUUGCGAUGUGGUAUAGGGUUCGUGAAACAACUGUUUACGAUCCUCUGC  
AGCCGGAGCUGGACUCGUUCAAGGAAGAACUGGACAAGUACUUAAGAACCACACCAGCCGGAUGUAGAUUGGGUGACAUCAGUGGGAUAAUUGCAGUGUGGUC  
AAUAUCCAGAAAGGAGAUUGACCGACUCAAUAGAGGUUGCCAAGAACCUCAAUAGAGUCGCUAUAAGAUUCCAGGAGCUGGGGAAGUAGAGCAGUAUAUAAUGGGCC  
UUGGUAUAUUGGCUCCGCUCAUAGCCGGGCUAUCGCGAUAUGAUGGUGACGAUCAUGCUGUGCUGAUGACGUAUCGUGCAGCUGCCUGAAGGGGUGCUGCA  
GCUGCGGUUCUUGUUAAGUUCGACGAGGACGAUAGAGCCGGUGCUAAGGGGUAAGCUGCACUACACC

>Sequence D: (MFE -1967.4 kcal/mol, CAI 0.935)

AUGUUCGUAUUCUGGUGCUGCUGCCCCUGGUGAGCAGCCAGUGCGUGAACCCUGACCACCGCACUCAGCUGCCACCAGCGUACACCAACAGCUUACCCCGGGGU  
GUACUACCCCGACAAGGUGUUCAGGUCCAGCGUGCUCACAGCACGCAGGACCCUGUUCUUCUUCAGCAACGUGACUUGGUUCCAUGCCAUCACGUGAGUG  
GCACAAUGGAACCAAGCGCUUCGACAACCCUGUGCUGCAUUUAUAGCGGCGUUAUCUCCGACCGGAGAAGUCCAACAUCAUCAGAGGGUGGAUCUUUGGA  
ACCACCCUGGACUCCAAGACCCAGAGCUUCGUAUCUGGAACAACGCCCAACGUGGUAUCAAGGUGGCGAGUCCAGUUCUGUAUAGACCCUUCUGGGGGU  
CUAUAACCAAGAACAACAAGAGCUGGAUGGAGUCUGAGUUCAGGGUGUAUCCAGCGCAUAUAUUGCACAUCGAGUACGUGUCUCAGCCUUCUGAUGGAUC  
UGGAGGGGAAGCAGGGGAACUUAAGAACCUGCGGGAGUUCGUGUUAAGAACAUCGACGGGUAUCUUAAGAUCUAUUCCAAGCACACCCUAACCCUGGUGCGC  
GAUCUGCCUCAGGGUUCAGCGCCUGGAGCCCGUGGAGCCCGUGGACCCUGCCAUCCGCAUCAACAUCACCAGGUUCCAGACCCUGCGCCUGCACAGGAGUUAACUGAC  
UCCUGGGACUCCAGCAGCGGUGGACCCGGGGGUGCAGCCUACUACGUGGGUACUCCGACGCCCGGACCUCCUGCUGAAGUAACAACGAGAACGGCACCAUCA  
CCGAUGCCGUGGACUGCGCCUGGAUCCUUGUCCGAGACAAAGUGUACACUGAAGAGCUUACCCGUGGAGAAGGGGAUCUACACAGCCUCCAUCUACGGGUGCAG  
CCAACCGAGAGCAUUGUGCGCUUCCCCAAUAUCACAAACCUGUGUCCUUUGGGAGGUGUUAACGCUAUCUGGUUCGCUUCAGUGUACGCUUGGAAUCGGAAGAG  
GAUCAGCAAUUGCGUGGCUUAUACAGCGUGCUGUACAACAGCGCCUUCAGCACAUAUUAAGUGCUACGGGGUGAGUCCACAAAGCUGAACGAUCUGUUAUCA  
CCAACGUGUACGACAGCAGCUUUGUUAUCCGGGGCAUGAGGUGAGGCAGAUCCGCCCCGGGAGACCGGCAAGAUCCGGACUACAACUACAAGCUGCCCGACGAC  
UUCACCGGGUGUGUAUUGCUUGAAUAGCAACAACCUGGACAGCAAGGUGGGGGCAACUACAACUACCUUACCGGCGUUCAGGAAGUCCAACCUUGAAGCCUU  
UGAGAGAGACUUCUACAGAGAUCAUACAGGUGGCUCCACCCUAGCAUUGGGGUGGAGGGGUUAACUGCUAUCUUCUCCUCCAGAGCUAUGGCUUCCAGCCCA  
CCAACGGGGUGGGUACACGCAUACCGGGUGGUGGUCAGCUUUGAGCUGCUGCACGCCCGCCACCGUGUGCGGCCAAAGAAGAGCACAACCUUGGUGAAG  
AACAAAGUGCGUGAACUUAACUUAUAGGCCUGACAGGCACCGGGGUGCUGACCGAGUCCAACAAGAAGUUCUCCAGCAGUUGGCGAGGACAUCGCGGA  
CACUAACAGAUCCGUGCCGGAUCCCCAGACCCUGGAGAUCCUGGACAUCACCCUUGUAGUUCGGCGGGGAGCGUGAUCACCCCGGCACAAACACCUCCAACC  
AGGUGGUGUGCUGUACAGGACGUGAACUGCACCGAGGUGCCUGUGGCAUCCACCGCAUCAGCUGACCCCAACUUGGCGGUGUACAGCACAGGACGAAUGUG  
UUCACAGACGCGCCGGGUGCCUGAUCGGCGUGAGCACGUGAAACAACAGCUACGAGUGGACAUCUUAUUGCGCGGGGAUCUGGCCAGCUACAGACCCAGAC

CAACUCUCCACGGCGGGCCCGGUCAGUGGCCUCCAGAGCAUCAUUGCCUACACAAUGAGCCUGGGGGCCGAGAACAGCGUGGCCUUAUGCAAUAACUCUAUUGCUA  
UCCCCACAAAUUUUAACAUCAGCGGUGACCAAGAGAUUCUGCCCGUGAGCAUGACCAAGACCUCUGUGGACUGCACCAGUACAUUUGUGGGGACAGCACCAGUGC  
AGCAACCUGCUGCUGCAGUACGGCAGCUUCUGCAGCUGAACAGGGCCUGACCGGGAUCGCCGUGGAGCAGGACAAGAACCACCCAGGAGGUGUUUGCCAGGU  
GAAGCAGAUUCAAGACCCCCCAUCAAGGACUUCGGGGGUUCAACUUCAGCCAGAUUCUGCCAGAUCCCUCAAGCCAGCAAGCGGUCCUUAUCGAGGACC  
UGCUGUACAACAAGGUGACUCUGGCAGAUUGCGGUUCAAGCAGUACGGGACUGCCUGGGGACAUCGCGGCCAGAGACCUGAUCUGCGCCAGAAGUACAAC  
GGGUCACCCGUGCUGCCCCACUGCUGACUGAGAGAUAGCUCAGUACACAGGUGCUCUGCUCGCCGGGACAAUACCCUCCGGGUGGACUUUUGGGGUGGAGC  
UGCCUGCAGAUCCCUUGCCAUAGCAGAUUGGCUAUCGUAACAGGCAUUGGGGUGACCCAGAACGUGCUGUACAGAAACCAGAACGUAUCGCCAAUCAGUUUA  
AUAGCGCAUCGGGAAGAUUCAGGACAGCCUGAGCAGCAGCCAGCGCCUGGGGAAAGUCCAGGACGUGGUAACCAGAAUGCUCAGGCCUGAAUACCCUGGUG  
AAGCAGCUGUCCAGAACUUCGGCGCAUCUCCAGCGUCUACAAGCAUUCGAGCAGGUGGACAAGGUGAGGCGGAGGUGCAGAUCAUCGGCUGAACAGG  
UAGGUGCAGAGCCUGCAGACCUACGUGACCCAGCAGCUGAUCGGGUGCAGAGAUUCGUGCCAGUGCCAACUGGCCUACCAAGAUGAGCGAGUGUGUGCUGG  
GACAGAGCAAGCGGGUGGACUUCUGUGGAAGGGCUAUCACCCUGAUGUCCUCCACAGUCCGCCCCUCACGGGGUGGUGUCCUGCAGCUGACCUACGUGCCGCC  
CAGGAGAAGAAUUCACCACCGCCCCCGCAUCUGCCACGAGCGGAAAGGCCCAUCCUCCUGGGAGGGGUGUUCGUGUCCAACGGCACACUGGUUCGUGACCCA  
GCGGAACUUUACGAGCCCAUCAUACACAGACAACACUUCGUGAGUGGCAACUGUACGUGGUAUCGGGAUCGUGAAACAACUGUGUACGUCCUCUGC  
AGCCCGAGCUGCAGCUUCAAGGAGGAGCUGGACAAGUACUUAAGAACCACACCUCUCCUGAUGGACCGGGUGACAUCAGCGCAUCAACGCCAGCGUGGUG  
AACAUCCAGAAGGAGAUAGCAGGCUAAGAGGUGGCAAGAACCUCUACAGAGCCUGAUCGUAUCUCCAGGAGCUGGGGAAGUACGAGCAGUACAUUAGUGGCC  
CUGGUACAUCUGGCGGGGUCAUCGCCGGCUGAUCGCAUCGUGAUGGUGACCAUCAUGCUGUGCUGCAUGACCAGCUGCUGCAGCUGCCGAAGGGCUGCUGCA  
GCUGCGGGUUCUGUAAGUUCGACGAGGACGACAGCGAGCCGUGCUGAAGGGGUGAAGCUGCAUACACG

>Sequence E: (MFE -1961.3 kcal/mol, CAI 0.851)

AUGUUCGUUUUUUAGUGCUGCUGCCCCUGGUGAGCUCUCAGUGCGGAAACCUGACCACCGGUAACGAGCUGCCCCUGCGUACACCAACAGCUUCACACGGGGGUG  
CUACUACCCUGACAAGGUGUUAGAUCUCCUGGUGCAGUACGACGAGACCCUUCUCCUGCCGUUUUCUUAACGUGACAUGGUUCCAUGCCAUCACGUUAGCG  
GAACCAACGGCACGAAGAGGUUCGACAACCCCGUGCUGCCUUAACAGCGGGGUGUACUUCGCUUACUGAGAAGAGUAACAUCAUCCGGGGUGGUAUCUUGGC  
ACUACCCUGGACUGAAGACCCAGUCACUGCUGAUCGUGAACAACGCGACCAACGUGGUAUAAGGUCUGCGAGUCCAGUUCUGUAUAGACCCUUCUGGGGUG  
CUUUUACCAAGAACAACAAGAGCUGGAUGGAGUCUGAUCAGAGUCUAUUCGAGCGCAACAACUGCACCUUCGAGUACGUCUCUACGCCUUCUGAUGGACC  
UCGAGGGUAAGCAGGGCAACUUAAGAACCUGCGGAGUUCGUGUUAAGAACAUAUGAGGUAACUUAAGAUCUACUUAAGCACACCCCAUCAUUCUGGCGC  
GAUCUCCCGCAGGGUUCAGUCCUGGAGCCACUCGUGGAUCUGCCUAUUGGCAUCAACAUCACGCGGUCCAGACCCUGCGGCACUGCACAGGAGUUAACUGAC  
CCCAGGUGAUCUCCUCCAGCGGGUGGACCGUGGGGAGCUGCGUACUACGUGGUUAUCUUCAGCCAGGACCUUCUGCUGAAGUAUAACGAGAACGGCACCAUCA  
CCGACCGCGUGGAUUGUGCCUGGAUCCACUGUCAGAGACUAAGUGCACAGUAGUUCUACAGUGGAGAAGGGCAUAUACAGACCUUGCAUUCGGGUGCCAG  
CCAACCGAGAGCAUUGUGCGCUUCCCAUAUACACAACCCUGUGUCCUUGGGGAGGUGUUAACGCUACUCGGUUCGCUUCCGUGUACGCCUGGAACAGGAAGAG  
AAUCAGCAAUCGUGUUGCUGAUUACUCUGCUGUACAACAGCGCCUUCUUAAGCAUUAAGUGCUAUGGAGUUCUCCACGAAGCUGAACGAUCUGUUAUCA  
CUAAUGUGUACGACAGAUUCGUUCGUGAUCGGGGGACGAGGUGCGGAGAUUCGCUCCGGGAGACCGGGAAGAUCCCGGACUACAACUACAAGCUUCCAGACGAU  
UUCACUGGUGUGAUCGCCUGGAAUCCAACAACCUUGACUCCAAGGUGGGGAAACUACAACUACCUUACAGGUGUUCCGGAAGUCCAUCUUAAGCCAUU  
CGAGCGGGACUACAGCACUGAUCUACAGGCGGACGACUCCAUGCAACGGCGUGGAGGGGUUAACUGCUACUUCUCCUCCUGCAGAGCUACGGGUUCAGCCCA  
CCAACGGGGUGGGUACCGCCUACCGGUGGUGUGCUGAGCUUCGAGCUGCUGCACGCCCGGCGACGGUCUGCGGUCCAAAGAAGAGCACCAACCUUGGUGAAG  
AAUAAGUGCGUUAUUUCAACUUAACGGGCUUACCGGCACCGGGGUGCUCAGGAGAGCAACAAGAAGUUCUUGCCUUCAGCAGUUCGGCCGGGACAUUGCUGA  
CACCACCGACGUGUCCGGGAUCCCGAGCCUGGAGAUCCUGGACAUAUCUCCGUGUUCGUGGGGGGUGAGCGUGAUCACCCCGGAACGAACACGAGUAACC  
AGGUGGGGUGCUGUACAGGAUGUCAACUGCACAGAGGUGCCAGUUGCAUCCACCGCAUCAGCUGACCCCAACUGGCGGGUGUACAGCACCGGCUGCAACGUG  
UUCAGACACGUGCUGGGUGCCUGAUGGCGCCGAGCACGUGAACAACUCGUAACGAGUGGACAUCUCCUCCGUGGUGAUAUUGUGCGAGUUAACAGACCCAGAC  
CAACUCGCGGAGGCGUGCACGUCGGGUGCCUCCAGAGCAUCAUCGCCUACAGAUAGCCUGGGAGCGGAGAAUAGCGUGCGUAUAGCAAUAACAGCAUUGCUA  
UACCCACGAAUUUACAUCUCCGUGACAACGGAGAUUCGCGGUGUCUAUGACCAAGACAUCGGUGGACUGCAGAUUACUUCGCGGCAGCAGCACCAGUGC  
AGCAACCUGCUGCUGCAGUACGGAUCCUUGUAUCUACGUGAACAGGGCGUGACUGGGAUUGCUGCAGCAGGACAAGAACCACCCAGGAGGUGUUCGCCAGGU  
CAAGCAGAUUCAAGACCCCCGAUAAAGGACUUCGGAGGUGUUAACUUCAGUCAGAUCCUGCCUGACCCAAGUAAGCCUCCAAGAGGUCUUUAUCGAGGACC  
UGCUGUACAACAAGGUGACCCUGGUGAUGCCGGGUUCAUAAGCAGUACGGGUGACUGCCUGGUGAUAUUGCUGCGCGGACCGUAUCUGCGCGCAGAAGUACAAC  
GGGUCACCCGUGCUGCCCCCUGCUGACAGCAGAGAUUGCCAGUACACUUCGUCUGUAGCAGGGACCAUCAUCUGGAUGGACGUUUGGUGCAGGGGC  
CGCCUGCAGAUCCAUUCGCAUGCAGAUUGGCAUACCGGUUCAACGGAAUCGGGUGACUCAGAACGUUCUGUACGAGAACGAAAGCUGAUAGCUAACAGUUA  
ACAGCGCUAUCGGUAAGAUUCAGGACUCACUGAUCUCCCGCUACGCGCUGGGGAAAGCUGCAGGACGUUGGAAACCAGAACCCAGCGCUGAACACCGUGGUG  
AAGCAGCUGUCCAGCAACUUCGGCGCAUCUCCUGGUGCUGAUAUGACAUCUCCUGCAGCGGUGGACAAGGUGAGGCGGAGGUGCAGAUCCAGCGCUGAACCCGG  
UAGGUGCAGAGCCUGCAGACCUACGUGACCCAGCAGUUGAUCGCGCGGAGAUCCGGGCCUCCGCAACUGGCGGCCACAAAGAUGCAGAGUGUCCUGG

GCCAGAGCAAGAGGGUGGACUUUUGCGGCAAGGGAUACCAUCUGAUGUCUUUCCCCAGAGCGCCCUCAUGGGGUGGUCUCCUGCACGUGACUUUUGGCCGGCG  
CAGGAGAAGAACUUCACCAACUGCGCCGGCAUUUGUCACGACGGGAAGGCCCAUUUCCGCGGGAGGGGUGUUCGUGAGCAACGGCACCCACUGGUUUGUGACUCA  
GAGAAAUCUUUAUGAGCCACAGAUCAUUAACACUGACAAUACCUUUGUCAGUGGUAUUUGCGACGUGGUGAUUGGGAUCGUGAAACACCGUUUACGAUCCCCUCC  
AGCCCAGCUGGACUCCUUAAGGAGGAGCUUGAUAAAGUACUUAAGAAUCACACGUCGCGGACGUGAUCUCGAGACAUCUCCGGGAUCAACGCCUCCGUGGUC  
AAUUAUCCAGAAGGAGAUUGACCGGCUAACGAGGUUGCCAAGAACCUGAACGAGAGUCUGAUUAGCCUCCAGGAGCUUGGCAAGUACGAGCAGUACAUAAGUGGCC  
CUGGUACAUCUGGCUCCGCUCAUUGCCGGGCUAUGCCCAUCGUAUGGUGACCAUCAUGUUGUGCUGCAUGACGAGCUGCUGCAGCUGCCUGAAGGGCUGCUGCA  
GCUGCGGCUUGCUGCAAGUUCGACGAGGAUGACGAGCCCGUGCUCAAGGGGUGAAGCUGCAUUUAUACC

>Sequence F: (MFE -1969.3 kcal/mol, CAI 0.755)

AUGUUCGUGUUCUUGGUCUGUCCCGUUGGUGUCCAGUCAGUGUUAUUCUGACCACCCGGACCCAGUUGCCCCCGGUAUACGAACUCGUUUACGGGGGGGU  
GUACUAUCCGGACAAGGUCUUCGUGCAGUGUGUUCACUCGACCCAGGACCCUUCUCCCGUUUUUCUUAACGUGACAUGGUUCCAUGCCAUAUCGUUAGUG  
GAACUAACGGGACGAAGAGGUUUAUUAUCCUUGUUCUCCGUUAACAGCGGGGUGUACUUCGCGUCGACGGAGAAGCAUAUUAUCAGAGGGGUGAUUCUUGGG  
ACCACCCUCGACAGUAAGACGACUGCUCUUAUUGUCAACAACGCCACUAUUGUGGUGAUCAAGGUUUGGAGUUCAGUUCUGUAUAGACCCUUCUUGGGGU  
CUAUUACCAAGAACAACAAUUCUUGGAGUGGAGUCGAGUUCGAGUCUAUAGCAGCGCAACAACUGCACGUCGAGUACGUGUCCAGCCAUUCUUUAUGGACC  
UGGAGGGUAAGCAGGGUAAUUUUAAGAACCUGCGAGAUUCGUGUUAAGAACAUCGACGGGUAUUUUAAAUAUACUUAAGCAUACCCUUAUUAUCUGUUCGG  
GAUUCUCCCCAGGGUUCAGUGCUCUGGAGCCCGUGGGAUUUGCGGAUAGGGAUUAUAUACACGCGUUUCCAGACGCGUUGGGCUGCACCCGAGUUACCUGAC  
UCCGGGGGAUAGCUCUACAGGCUUGGACUGCUGGUGCCGGCGCUAUAUGUGGGUACCUCAGCCCGGACGUCUUGUUAAGUAACAACGAGAACGGCACGUA  
CUGACCGGGUGGACUGCGCCUGGAUCCGCUUUCGAGACCAAGUGUACUCUACAAGAGCUCUACCGUGGAGAAGGGGAUCUACAGACCUUAUCUAGGGUGCAG  
CCUACUGAGAGUAUUGUUCGUGUCCGAACAUCACGAACUUAUGCCCGUUCGCGGAGGUGUUAACGCCACCCGAUUCGCGAGCGUAUACGCGUGGAACCGAAAGCG  
GAUCAGCAAUUGUGGCGUACUACCGGUGCUGUACAACAGCGCAUUCAGCACAUAUUAAGUGCUACGGGGUGAGUCCAACCAAGCUCUUAUUCUGGCUUCA  
CGAAUUGUCUACGUGACAGCUUCGUAUCCGGGGCAGCAGGUGCGCCAGAUAGCGCGGGGACAGCCGGCAAGAUCCCGGACUACAUAUUAAGCUCUCCGACGAC  
UUCACAGGUUGUUAUUGCCUGAAUAGCAACAACCGGAUAGUAAGGUCGGGGGAUUAUUAUUAUACUGUACCGCCUUCUCCGGAAGUCCAUCUUAAGCCAUU  
CGAGCGGGACUUCUACAACGGAGUAUAUACAGGUGGUAUCACUCCAGCAACGGCGUGGAGGAUUAACUGUUAUUUUCGUGCAGUGCUACGGGUCCAACCGA  
CGAAUUGGGUCGGUACACCGUACCGGUGGUGGUCUCUCCUUGAGCUCUCCACGCGCGGCUACGGUAUGCGGCCCAAGAAGUCGACUAAUUCUUGAAG  
AAACAAGUGUGUACAUCUUAUUAUUGGGUAGCGGAAACAGGCGUGCAGCGGAGAGCAACAAGAAGUUCUCCGUAUCCAGCAGUUCGGCCGGGAUUCGCGGA  
CACCACGGUAGCCGUGGGAUCCCGAGCCUUGGAGAUCCUGGACUUAUCUCCGUGUUCGUGGGGGGUGAGCGUACUACCCCGGAACGAACACGAGUAACC  
AGGUUGCCGUCUUAACAGGACGUCUACUCCAGGUGCCGUGUUAUACACGCGGACAGUUGACCCCAUCUUGCGCGUGUAUAGCACGGGCUCAACCGU  
UUUCAGACAGUGCUGGGUGCCUGAUGGCGCGAGCAGGUAUAACUCGUAACGAGUGGUAUACCCUAGGAGCUGGAUCUGCGCCAGCUACAGACGACGAGC  
GAACAGUCCGCGUCGCGCGGAGCGUUGCGUCACAGUAUACUCCUACAGUUGUUCGUAAGGCGUGGAAUCUUGGCGUAACAGUAACAUAUUCGAUCGCCA  
UCCCGACGAAUUUAACGAUUCUCCGAGACAACGGAGAUCCUGCCGUGAGCAUGACGAAGACCUCGUAAGCUGUACCAUGUACAUCUGCGGAGACUCUACGGAGUGC  
UCAAAACCGUCUCCAGUACGGGAGCUCUGCACUCAGCUGAACCCGAGCCUCACGGGUAUUGCUGCAGCAGGACAAGAUAUACCCAGGAGGUGUUCGCCAGGU  
GAAGCAGAUCAACAAGACUCCUCCGAUAAAGGACUUUGGAGGUAUUAUUCUCCGAGAUCCUGCCAGAUCCUAGACCCUCAAAGCUCAUUUAUCGAGGACC  
UCUUGUUAACAAGGUGACGUGGUGAUGCCGGCUUCAUAGCAGUACGGUGACUGCCUGGUGUAUUGCUGCGCGGACCGUAUCUGCGCGCAGAAGUUAAC  
GGGCUACCGUGCUGCCCCCUGCUGACGGACGAGAUAGUCCCGAGUACACGUCGGCCUGCUGGCCGGAACGAUACACAGCGGUGGACGUUCGCGCAGGGG  
GGCGUCCAGUAACGUUCGCAUGCAGAUUGGCGUAUCGGUUAUUGGAAUCCGGGUAUCCAGAAAGUUCUACGAGAAUACGAAGCUGAUUGCCAUCAGUUUA  
AUUCUGGUAAGGGAAGAUUCAGGAUAGCCUGAGUUAACCGCGAGCGGUGGGUAAGCUGCAGGACGUAGUUAACCGAAGCGCAGGCCUUAACACGCGUGG  
AAGCAGCUCUGGUAUUUUGGGGUAUCAGCAGCGUUCUAAUGAUUAUUCGUCGACUUGGACAAGUUCGAGGAGAAGUUCAGAUAGAUCCGCUAUCACGGG  
GCGGUGCAGUCGUUACAGACCUAUGUGACGCAGCAGCUAUCGUGCAGCCGAGAUCCUGGCCUCAGCUAAUUAAGCCGCUACGAAGAUGUCCGAGUGCGUUCUG  
GACAGUGAAGCGGUAGAUUUCUGGCAAGGGUUAUCAUUAUGAGCUCUCCCCAGUCCGCCCUCAUGGGGUGGUCUCCUGCACGUGACUUAUUGGCCGGCG  
CAGGAGAAGAACUUCACCAACUGCGCCGGCAUUAUGUCACGACGGGAAGGCUAAUUCGCCGCGAGGGGUGUUCGUGUUAUUGGACGACUGUUCGUGACGCA  
GCGGAACUUCUAGAGCCUAGAUUAUCAACAACUGACAACACCUUCGUGAGCGGGAUUGCGAUGUCGUAUAGGCAUCGUAUAAUUAACAGUUUAUGACCCACUUC  
AGCCGAGCUCGACUCCUUAAGGAGGAGCUGGAUAAGUAUUAAGAAUCACACGUCGCGGACGUGGAUUUGGAGUAUAUACCGGCAUCAACGCCUCCGUGGUC  
AAUAUCCAGAAGGAGAUUGACCCUGAACGAGGUGCCAAGAACCUGAACGAGAGUCUGAUUAGCCUCCAGGAGCUGGCAAGUACGAGCAGUAUAUCAAGUGGCC  
UUGGUAUAUCUGGUUGGGUUCUUAAGCAGGCCUUAUAGCAAUUGUCAUGGUGACGAUACUGCUGCUGCAUGACGUAUGCUGCAGUUGCUUAAGGGCUGCUGUA  
GCUGUGGUUCUUGUUAAGUUCGACGAGGACGACGAGCCCGUGCUGAAGGGGUGCAAGCUGCAUUUAUACC

>Sequence G: (MFE -1639.3 kcal/mol, CAI 0.935)

AUGUUCGUAUUCUAGUGCUGUCCCGUGGAGCAGCCAGUGCGUAACCGACACACGACUCAGCUGCCACAGCCUACACCAACUUAUACCCAGGGGCGU

GUACUAUCCUGACAAGGUGUUCAGGAGCAGCGUGCUCACUCCACCCAGGAUCUGUUCUGCCUUCUUCAGCAACGUGACAUGGUUCCACGCCAUCCACGUGAGCG  
GGACAAACGGCACCAAGCGGUUUGACAAUCCCGUUCUGCAUUAACGAUGGGUGUAUCUUCGCCAGCACCGAGAAGAGCAACAUAUCCGGGGCUGGAUCUUCGGC  
ACCACACUGGACAGCAAGCCAGAGUCUGCUGAUCGUGAACAACGCCACCAACGUGGUGUAUCAAGGUGUGAGUUCAGUUCUGUAUAGACCCUUCUGGGGGU  
CUAUUACCAAGAACAUAUAAAGCUGGAUGGAGAGCGAGUUCGGGUGUACAGUAGUGCCAACAACUGUACAUCAGUACGUGUCCAGCCAUUCUGAUGGACC  
UGGAGGGGAAGCAGGGAAACUUAAGAACCUGCGGGAGUUCGUGUUUAGAUAUACGACGGUAUUUUAGAUCUACUCCAAGCACACCCCAUCAAACUGGUGCGG  
GAUCUGCCCCAGGGUUCAGCGCCUGGAGCCUUGGUGGACCUGCCAUCCGGAUCAACAUCACCCGGUUCAGACCCUGCGCCUGCACCCGAGUUACCUGAC  
CCCAGGUGACUCCAGCAGCGGUGGACAGCCGGGGUGCAGCCUACUACGUGGGUACUCCUGCAGCCCGGACCUUCUCCUGAAGUACAAGAGAACGGCACCAUCA  
CCGAUGCCGUGAUUGUGCUCUGGACCCUUGCUGAGACCAAGUGCACCCUGAAGAGCUACCCGUGGAGAAGGGGAUCUACCAGACAAGCAAUUCCGGGUGCAG  
CCCACCGAGAUUUCGUGAGGUUCCCAACAUCACCAACCUGUGUCAUUCGGGGAGGUGUACAACGCCACCCGGUUCGCAAGCGUGUACGCUUGGAACCGGAAGCG  
CAUCAGCAAUUGCGUGGUGAUUACAGCGUGCUGUACAACAGCGCCUUCUACGACAUUCAAGUGCUACGGCGUCUCCCCACAAAGCUGAACGAUCUGUUAUCA  
CCAACGUGUACGACAGACGUUUGAUUCCGGGAGACGAGGUGCGGAGAUUCGACCCCGGAGACCGGCAAGAUGUGACUACAUAUUAAGCUGCCUGAUGAC  
UUCACAGGUGCGUGAUUGCCUGGAACAGCAAUAACCGGACAGCAAGGUGGGAGGUAUUACAUAUACCUUACCGGCGUUCAGGAAGUCAAUCUGAAGCCUUC  
CGAGAGGGACAUCUCCACCGAGAUUACCAGGUGGUCACCCCAUGCAAUGGGGUGGAGGCUACAACUGCUACUUCUCCUUGCAGUCCUACGGUUCACGCCCA  
CCAUGGGGUGGGUACAGCCUACCGGUGGUGUGCUGAGCUUCGAGCUCUCCGACGCCCCCGCACUGUGUGCGGCCCAAGAAGUCCACCAACCGGUGAAG  
AACAGUGCGUAACUUAACUUAACGGGUGACCGGACUGGGUGCUCACAGAGAGCAACAAGAAGUUCUCCUCCAGCAGUUCGGAAGGGACAUCGCCGA  
CACCAAGGUGCGGAGGGAUCCCGAGCCUUGGAGAUCCGGAUCAACGCAUUCUUCGGGGGUGAGCGUGAUCUCCUGGCACAAACACCUCCAACCC  
AGGUGGUGUGUACAGGACGUGAACUGCACCGAGGUGCCUGGCAUCAUGCUGACCCAGCUGACCCCAACCGGCGGUCUACAGCACCGGACAGCAACGUG  
UUCAGACCCGGGCGGUGCUGAUCGGGGCGGACGAGCAACAACAGCUACGAGUGCGAUUCCCCAUCGGCGCGGAUCUGCGCUAGCUACCAGACACAGAC  
CAAUAGCCCCAGACGGUCUAGGUCUGGCUAGCCAGAGCAUCAUGCCUACAUUGUCUCUGGGCGCAGAGAAUAGUGGCUUACAGCAACAACAGCAUCGCCA  
UUCACUAUUUACAUAUAGUGGACCAACCGAGAUCCUGCCUGGAGCAUGACCAAGACCAGCGUGGACUGCACCAUGUACAUCUGCGGGGAUAGCACCGAGUGC  
AGCAACCGUGCUGCAGUACGGCAGCUUCUGCACACAGCUGAACCCGGGCCUGACCGGUAUCGUGGAGCAGGACAAGAACACCCAGGAGGUGUUGCGCAGGU  
GAAGCAGAUUCAAGACCCUUAUCAAGGACUUCGGGGCUUUAACUUCAGCCAGAUCCUGCCAGACCCUCAAAGCCUCAAAGAGGAGCUUCAUCGAGGAUC  
UCCUGUACAACAAGGUGACCCUGGCCGAUGCCGGCUUCAUAGCAGUACGGAGAUUCCUGGGGCAUCGCGCCGAGGAUCUACUUGCGCCAGAAUUAAC  
GGCCUGACCGUGCUGCCCCUUGCUGACCGAUGAGAUGAUCGUCAGUACACCAGCGCCUGCUGGCGGACCAUACCAGCGGGUGGACCUUCGGGGCGGCGC  
CGCCUGCAGAUCCUUCGCCAUGCAGAUUGCCUACCGGUUAACGGUAUUGGGGUGACCCAGAAUGUGCUGUAUGAGAACCAAGAGCUGAUCGCCAACCAAGUUA  
ACUCUGCCAUCCGCAAGAUCAGGACUCCUGAGCAGCAGCUGCCAGCGCCUUGGGCAAGCUGCAGGACGUGGUAACCAGAACCCAGGCCUCAAUACCCUGG  
AAGCAGCUGUCCAGCAACUUCGGGGCAUCAGCAGCGUGCUGAACGACAUCUCCUGCCCGCUGGACAAGGUGGAGGACAGGUGCAGAUCCGCGUACACAGG  
UAGGCGCAGAGCCUGCAGACCUACGUGACCCAGCAGCUGAUCGCGCCGUGAGAUUAGGGCCAGCGCAACUUGGCCGCAUAAGAUGAGCGAGUGCGUGCUGG  
GCCAGAGCAAGCGGGUGGACUUCUGCGGCAAGGGUAUCACCGAUGAGCUUCCUAGUCCGCCCCCAAGGGGUGGUGUCCUGCAGGACAUACGUGCCCGCC  
CAGGAGAAGAUCUACCAACCGCCUUGCAUCUGCCACGAUGGCAAGGCCCAUUCUCCCGGGAGGGGUGUUCGUGUCCAAUGGCACACAUUGGUUCGAGCCCA  
GCGGAACUUCUACGAGCCACAGAUCAUUAACUUGUACAGUUGUAACUUGUACGUGGUAUCGGCAUUGUGAACACACAGUUAACGAUCCUUGC  
AGCCAGAGCUGGACAGCUUAAGGAGGAGCUGGACAAGUACUUAAGAACCACACAGCCCGACGUGGAUCUUGGAGACAUCUUGGCAUACACGCCAGCGUGGUC  
AACAUCCAGAAGGAGAUUGACCGCUGAACGAGGUUGCAAGAACCUGAACGAGAGUCUAGUACGACCUCCAGGAGCUGGCAAGUACGAGCAGUACAUAUGGGCC  
AUGGUACAUCUGGCGGGUUAUCGCGGCCUGAUCGCAUCGUGAUGGUGACCAUCAUGCUGUGCUGAUGACCUCUUGUUGCAGCUGCCUGAAGGGGUGCUGCA  
GCUGCGGUAUGUUGUUAAGUUCGACGAGGACGACAGCGAGCCCGUGCUGAAGGGCGUGAAGCUGCACAACAG

>Sequence H: (MFE -1244.4 kcal/mol, CAI 0.936)

AUGUUCUGUUCUGGUGCUGCUGCCUUGGUGUUCUCCAGUGCGUGAAUCUGACUACCAGGACCCAGCUGCCCCUGCCUUAUACCAAUUCCUUCACACGGGGCGU  
GUACUAUCCGACAAGGUGUUAGAAGCUCGUGCUCACUACACAGGAUCUGUUCUGCCUUCUUAAGCAACGUGACCUUGGUUCCACGCCAUCCACGUGAGCG  
GCACCAUUGGCACAAAGCGGUUCGACAAUCCAGUGCUGCCUUAACGAUGGGUGUAUCUUCGCCUUAACCGAGAAGAGCAACAUAUCAGAGGCGUGAUUUUGG  
ACCACACUGGACUCCAAGACACAGUCUCUGCUGAUCGUGAACAAGGCCACCAACGUGGUAUCAAGGUGUGCGAGUUCAGUUUUGUAUAGAUCCAUUCUGGGCGU  
GUACUAUCACAAGAACAUAAGAGCUGGAUGGAGUCGAGUUCGCGUGUAUUCUAGCGCAACAUAUGCACAUAUUGAGUACGUGUCCAGCCUUCUGAUGGACC  
UGGAGGGCAAGCAGGCAAUUUAAGAACCUGAGGAGUUCGUGUUUAGAUAUACGAUGGCUACUUAAGAUCUACUUAAGCACACCCCAAUCAAACCGGUGCGC  
GACCGCCACAGGGUUCAGCGCCUGGAGCCACUGGUGGAUCUGCCAUCCGGAUCAACAUCACCCGGUUCAGACACUGCUGGCCUUGCAGAGAAGCUACCUGAC  
ACCAGGGACUCCUUCUAGCGGAUGGACCGCAGGAGCAGCAGCCUACUAGUGGGUUAUCUGCAGCCAGGACCUUCUGGUGAAGUACAACGAGAUGGCACCAUCA  
CAGACCGCGUGGAUUGCGCCUGGAUCCUUGAGCGAGACAAAGUGUACACUGAAGUCCUUAACCGUGGAGAAGGGCAUCUUAUCAGACAUCCAAUUUACGGGUGCAG  
CCUACCGAGUCUACUGGCGCUUCCCAAUACACAACCCUGGCCCCUUGGGCAGGUGUUAACCGCAACAGGUUCGCAAGCGUGUACGGAUUGAAUGGAAGCG  
CAUCUCUAACUGCGUGGCCGACUAUAGCGUGCUGUACAACUCCGCCUUCUACGACCCUUAAGUGCUAUGGGGUGUCCCCACAAAGCUGAAUGACCUGGUCUUA

CCAACGUGUACGCCGAUUCUUUCGUGAUCAGGGGGACGAGGUGCGCCAGAUCCGACCCAGGACAGACAGGCAAGAUCCGACUACAAUUUAAGCUGCCUGACGAU  
UUCACCGGUGUGAUCGCCUGGAACAGCAACAUCUGAUUCCAAGUGGGCGCAACUACAUAUUCUGUACCGGCGUUUAGAAGAGCAAUCUGAAGCCAAU  
CGAGAGGGACAUCUCUACAGAGAUUACCAGGAGGAAAGACCCCAUGCAAUGGAGUGGAGGCGUUUAACUGUUUUUCCUCUGCAGUCCUACGGUCCAGCCAA  
CCAACGGCGUGGGCUAUCAGCCUACCGCGUGGUGUGUGAGCUUUGAGCUGCUGCACGCCUGCAACAGUGUGCGACCAAAGAAGUCCACCAAUCUGGUGAAG  
AACAGUGCGUGAACUUAACUUAACGGCCUGACCCGAAACAGGCGUGCUGACCGAGUCCAACAAGAAGUCCUGCCUUUUCAGCAGUUCGGCAGGACAUCGAGA  
UACCACAGACGCCUGCGCGACCCUCAGACCCUGGAGAUCCUGGAUAUACACCAUGUCUUUCGGCGGUGAGCGUGAUCACACCAGGACCAAUAACAAGCAACC  
AGGUGGCCUGUGAUCAGGACGUGAAUUGUACCGAGGUGCCAGUGGCAAUCCACGCAGAUACGUCACCCUACAUUGGCGGUGUACAGCACCGGCCUACACGUG  
UCCAGACAAGAGCAGGAUGUCUGAUCGGAGCAGACGUGAACAAUUCUUAUGAGUGCGACAUCUUUACGCGCGGCAUCUGUGCCUUUACCAGACCCAGAC  
AAACUCUCCAAGGAGAGCAGGAGCGUGCAUCCAGUCUAUACUCCUUAUACCAUGUCCUGGGCGCGAGAAUUCUGUGGCCUACUCUAACAUAUGCAUCGCCA  
UCCCUACCAACUUCACAAUCUCUGUGACCAAGAGAUCCUGCCAGUGUCCAUGACCAAGACAUCUGUGGACUGCACAUGUAUAUCUGUGGGGAUUCUACCGAGUGC  
AGCAACCUGCUGCUGCAGUACGGCAGCUUUUGUACCCAGCUGAAUAGAGCCUGACAGGCAUCGCCUGGAGCAGGAUAAGAACAACAGAGGUGUUCGCCAGGU  
GAAGCAGAUUCACAGACCCCAUCAAGGACUUUGCGGCUUCAUUUUUCCAGAUCCUGGCCGAUCCUCCAAGCCCUUAAGCGGAGUUUAUCGAGGACC  
UGCUGUACAACAGGUGACCCUGGCCGAUGCCGCUUCAAGCAGUAUGGCGAUUGCCUGGGCGACAUCGCAGCACGGGACCUAUCUGUGCCAGAAUUUAU  
GGCCUGACCGUGCUGCCUCCACUGCUGACAGAUGAUGAUCGCACAGUACACAAGCGCCUGCUGGCGAGAACCAUCACAUCCGGAUGGACUUCGGCGCAGGAGC  
CGCCUGCAGAUCCUUUGCCAUGCAGAUUGCCUUAUCGGUUAACGGCAUCGGCGUACCCAGAAUGUGCUGUACGAGAACAGAGCUGAUCGCCAAUCAGUUUA  
ACUCCGCCAUCGGCAAGAUCCAGGACAGCCUGUCCUACAGCCUCCGCCUAGGCGAAGCUGCAGGAUGUGGUAUCAGAACGCCACGGCCUGAAUACCCUGGUG  
AAGCAGCUGAGCUCAACUUCGGCGCAUCUCUAGCGUGCUGAAUGAUAUCCUGAGCGCGUGGACAAGGUGGAGGAGGUGCAGAUCCAGCCGUGAUCACAGG  
CAGACUGCAGUCUCUGCAGACCUAUGUGACACAGCAGCUGAUCAGGGCAGCAGAGAUCAGGGCAAGCGCAAUCUGGCAGCAACCAAGAUUGCCGAGUGCGUGCUGG  
GCCAGUCUAAGAGAGUGGACUUUUGUGGAAGGGCUAUCACCUGAUGUCCUCCACAGUCUGCCUCCACGGAGUGGUGUUUCUGCACGUGACCUACGUGCCAGCC  
CAGGAGAAGAUCUACCAACAGCACCAGCAAUCUGCCACGAUGGCAAGGCACAUUCCUAGGGAGGGCGUGUUCGUGUCCAACGGCACCCACUGGUUGUGACACA  
GCGCAAUUUCUACGAGCCACAGAUCAUACCCACAGACAAUACCUUCGUGAGCGGCAACUGUGACGUGGUAUCGGCAUCUGGAACAAUACCGUGUAUGAUCCUCUGC  
AGCCAGAGCUGGACAGCUUAAGGAGGAGCUGGAUAAGUACUUAAGAAUACACCUCGCCGACGUGGAUCUGGGGACAUCAGCGGAUCAUAGCCUCCGUGGUG  
AACAUCCAGAAGGAGAUCCAGGCGUAACGAGGUGGCAAGAAUCUGAACGAGAGCCUGAUCGAUCUGCAGGAGCUGGGCAAGUAUGAGCAGUACAUAAGUGGCC  
UUUGUAUCUUGGCGGGCUAUCGCGGCCUGAUCGCAUCGUGAUGGUGACCAUCAUCUGUGCUGUAUGACAUCUCCUGUUCUUGCCUGAAGGGCUGCUGUA  
GCUGCGGCCUCUGUUGAAAUUCGAUGAGGAUGAUCCGAGCCUGUGCUGAAGGGCGUGAAACUGCAUUUAUACC

>BNT: (MFE -1220.1 kcal/mol, CAI 0.946)

AUGUUCGUGUUCUGGUGCUGCUGCCUCUGGUGUCCAGCCAGUGUGUAACCUGACCACAGAAACACAGCUGCCUCCAGCCUACACCAACAGCUUUACAGAGGCGU  
GUACUACCCCGACAAGGUGUCCAGAUCCAGCUGCUGCACUCUACCCAGGACCUGUUCUGCCUUUCUACGCAACGUGACCUUGGUUCCAGCCAUCCAGUGUCCG  
GCACAAUUGGCAACAGAUUCGACAACCCCGUGCUGCCUUAACGACGGGUGUACUUUUGCCAGCACCGAGAAGUCCAACAUCAUCAGAGGCGUGAUCUUCGGC  
ACCACACUGGACAGCAAGACCCAGACCUGCUGAUCGUGAACAAACGCCCAAACGUGGUAUCAAGUGUGCGAGUCCAGUUCUGCAACGACCCCUCCUGGGCGU  
CUACUACCAACAAGAACAAAGAGCUGGAUGGAAAGCGAGUUCGGGUGUACAGCAGCGCAACAACUGCACCUUCGAGUACGUGUCCAGCCUUUCUGAUGGACC  
UGGAAGGCAAGCAGGCAACUUAAGAACCUGCGGAGUUCGUGUUUAAGAACAUCGACGGCUAUCUUAAGAUCACAGCAAGCACACCCUUAUACCUUGGCGG  
GAUCUGCCUACGGGCUUCUGCUGGAAACCCUGGUGAUCUGCCUACGGCAUCAACAUCACCCGGUUCAGACACUGCUGGCCUGCACAGAAGCUACCCUGAC  
ACCUGGGGAUAGCAGCAGCGGAUGGACAGCUGGUGCCGCGCUUAUUGUGGCUUACUUGGCGUACCCUGCAGCCUAGAACCUCUGCUGAAGUAACAAGGACGGCAUCA  
CCGACGCCGUGGAUUGUGCUCUGGAUCCUCUGAGCGAGACAAAGUGCACCCUGAAGUCCUUCACCGUGGAAAAGGGCAUCUACCCAGACCAGCAACUCCGGGUGCAG  
CCCACGAAUCCAUUGGUGGUCUCCCAAUAUACCAAUUCUGUGCCCUCCGCGAGGUGUUAUUGCCACCAGAUUCGCCUCUGUACCCUGGAAACGGGAAGCG  
GAUCAGCAAUUGCGUGGCCGACUACUCCGUGCUGUACAACUCCGCCAGCUCAGCACCUUAAGUGCUACGGCGUGUCCCUACCAAGCUGAAGCAGCUGGCUUCA  
CAAACGUGUACGCGACAGCUUCUGAUCGGGAGAGUAGUGCGGCAGAUUGCCCUUGACAGCAGGCAAGAUCCGCGACUACAUAACAAGCUGCCCGACGAC  
UUCACCGGUGUGAUGCCUGGAACAGCAACAACCCUGGACUCCAAGUGCGGGCAACUACAUAUACUUGUACCGGCGUUCGGGAAGUCCAUCUGAAGCCUU  
CGAGCGGGAUCUCCACCAGAUUAUACAGGCGGCGACACCCUUGUAACGGCGUGGAAAGCUUCAACUGCUUACUCCACUGCAGUCCUACGGUUCUACGCCA  
CAAUUGCGGUGGCUAUCAGCCUACAGAGUGGUGUGCUGAGCUUGGAAACUGCUGAUGCCUCCAGUUGUGCGGCCUAAGAAAAGCACCAAUUCUGGAAG  
AACAAUUGCGUGAACUUAACUUAACGGCCUGACCCGGCACCGGCGUGCAGACAGAGACAAAGAAGUUCUGCAUCCAGCAGUUGGCGGGGAUAUCGCGGA  
UACCACAGACGCCGUAGAGAUCCCCAGACACUGGAAUCCUGGACAUCACCCUUGCAGCUUCGGCGGAGUGUCUGUGAUCACCCUUGGACCAACACCAGCAAUC  
AGGUGGACAGUGCUGUACAGGACGUGAACUGUACCGAAGUGCCCGUGGCAUUCACGCCGAUCAGCUGACACCUACAUGGGCGGUGUACUCCACCGGCGAGCAAUGUG  
UUUCAGACAGCGCGGUGUGAUCGAGGCGAGCAGCUGAACAAUAGCUACGAGUGCGACAUCUCCUACGCGCGUGAUAUCUGGCCAGCUACCCAGACACAGAC  
AAACAGCCUUGGAGGCCAGAAAGCGUGGCCAGCCAGCAGUAUUGCCUACAUAUGUCUCUGGGCGCGAGAACAGCGUGGCCUACUCCAACAACUUAUCGCUA  
UCCCAACAAUCUACCAUCAGCGUGACCAAGAGAUCCUGCCUGUGUCCAUGACCAAGACCAGCGUGGACUGCACCAGUAUCUUGCGGGAUCCACCAGGUGC

UCCAAACCGUCGUCGAGUACGGCAGCUUCUGCACCAGCUGAAUAGAGCCCUGACAGGGAUCGCCGUGGAACAGGACAAGAACCACCAAGAGGUGUUCGCCCAAGU  
 GAAGCAGAUCUACAAGACCCCUCAUCAAGGACUUCGGCGGCUUCAAUUUCAGCCAGAUUCUGCCCAGUCCUAGCAAGCCAGCAAGCGGAGCUUCAUCGAGGACC  
 UGCUGUUAACAAGAGACACUGGCCGACGCCGCUUCAAGCAGUAUGGCGAUUGUCUGGGGACAUUGCCGCCAGGGAUCUGAUUUUGGCCCAGAAGUUUAAC  
 GGACUGACAGUCGUCGCCUUCUGCUGACCGAUGAGAUGAUCGCCAGUAACAUCUGCCCUGCUGGCCGACAAUCACAAGCGGCGUGACAUUUGGAGCAGGCGC  
 CGCUCUGCAGAUCCCUUUGCUAUGCAGAUUGCCUACCGGUUCAACGGCAUCGGAGUACCCAGAAUGUCUGUACGAGAACCAGAAGCUGAUCGCCAACAGUUA  
 ACAGCGCCAUUCGGAAAGAUCCAGGACAGCCUGAGCAGCAGCAAGCGCCUGGAAAGCUGCAGGACGUGGUCAACCAGAAUGCCAGGCACUGAACACCCUGGUC  
 AAGCAGCUGUCUCCAACUUCGGCGCAUCAGCUCUGUGCUGAACGAUAUCCUGAGCAGACUGGACaaagUgGAGGCCGAGGUGCAGAUCCAGACAGACUGAUCACAGG  
 CAGACUGCAGAGCCUCCAGACAUCGUGACCCAGCAGCUGAUCAGAGCCGCCGAGAUUAGAGCCUCUGCCAAUCUGGCCGCCACCAAGAUUGUCUGAGUGUGCUGG  
 GCCAGAGCAAGAGAGUGGACUUUUGCGGCAAGGGCUACCACCGAUGAGCUCUCCUCAGUCUGCCCUCACGGCGUGGUGUUUCUGCACGUGACAUUUGGCCGCU  
 CAAGAGAAGAAUUCACCACCGCUCAGCCAUCUGCCACGACGGCAAAGCCCACUUUCCUAGAGAAGGCGUGUUCGUGUCCAACGGCACCCAUUGGUUCGUGACACA  
 GCGGAAUCUUCACGAGCCCAGAUCAUACCCAGCAACAACCUUCGUGUCUGGCAACUCGCGACGUCGUAUCGGCAUUGUGAACAAUACCGUGUACGACCCUCUG  
 AGCCCGAGCUGGACAGCUCAAAGAGGAACUGGACAAGUACUUUAGAACCACACAAGCCCGACGUGGACCCUGGGCGAUUACGCGGAAUCAAUCCAGCGUGGUG  
 AACAUCCAGAAAGAGAUCCAGCCGCGUAACGAGGUGGCAAGAAUCUGAACGAGAGCCUGAUCGACCCUGCAAGAACUGGGGAAGUACGAGCAGUACAUAAGUGGCC  
 CUGGUACAUCUGGCGGGCUUUAUCGCCGACUGAUGCCAUCGUGAUGGUCACAAUCAUCGUGUGUUGCAUGACCAGCUGCUGUAGCUGCCUGAAGGGCUGUUGUA  
 GCUGUGGACGUCUGCAAGUUCGACGAGGACGAUUCGAGCCCGUGCUGAAGGGCGUGAAACUGCACUACACA

The 5' and 3' UTR sequences used in the COVID mRNA vaccine experiments are listed below.

> 5' UTR

GGGAAAAAGAGAGAAAAGAAGAGAAGAAAAAGAGCCACC

> 3' UTR

GCUGCCUUCUGCGGGGCUUGCCUUCUGGCCAUGCCUUCUUCUCCUUGCACCUGUACCUCUUGGUCUUGAAUAAAGCCUGAGUAGGAAGU

## Sequences used in VZV mRNA vaccine experiments

The mRNA sequences (coding region) used in the VZV mRNA vaccine experiments are listed below (stop codons not included). All sequences encode VZV gE protein. gE A–E are our designed mRNA sequences, gE-Ther is the baseline sequence designed by conventional codon optimization method, and gE-WT is the wildtype sequence. In the experiments, we use one stop codon UGA for all sequences.

>gE-A: (MFE -1145.60 kcal/mol, CAI 0.787)

AUGGGAACAGUAAACAAGCCGUGGUGUGUGCUGAUGGGUUUCGGUAUCAUACCGGAACCCUUCGGAUACCAACCCUUGUCGUGCCAGCGUCCUCCGAUUAUGA  
 UGACUUCUAUUCGACGAGGACAAGCUGGACACGAACAGUGUCUAUGAGCCGUACUACCACUCCGACCAUGCGGAGAGUUCUGGGGCAAUCGUGGGGAGAGUAGUC  
 GUAAGGCUUACGACCACAACUCUCCUACAUUUGGCCAGGAACGACUAUAGCGGUUCCUGGAGAACGCCAUGAGCAUCAUGGGGUUACAACAGGGACGCGGC  
 AUAGACUCGGGCGAGAGGCUAUGCAGCCAACCCAGAUAGCGCGCAGGAGGAUCUCGGUGACGACACCGGGAUCCAGCUAUCUCCACUCUGAACGGUGACGACAG  
 GCACAAGAUUGUGAAUGUCGAUCAGCGUCAGUAUGGGGAUGUGUUAAGGGAGACCUCAAUCCCAAGCCGAGGGCCAGCGGCUAUGAGGUCUCCGUGGAGGAGA  
 ACCAUCCUUCACCCUGCGGCUCCAUCCAGCGGAUCUACGGGGUCCGGUAUACAGAGACGUGGAGUUUUCUCCGUCUCUGACUUGUACUGGCGAUGCAGCGCCA  
 GCGAUCCAGCACAUUCGCCUGAAGCACACCAGGUCUCCAGGAUGUGGUGGACGUGGACUGCGCGGAGAACCGAAGGAGGAUCAGCUUGCUGAGAUUAGCUA  
 CAGAUUCCAGGGCAAGAAGGAGGCCAGCCGUGGAUUGUGGUUAAUACCAGCAGCUGUUCGACGAGCUGGAGCUCGAUCCUCCUGAGAUCCAGCCCGCGUCC  
 UCAAGGUGCUGCGGACCGAGAAGCAGUACCUUGGGGUCUACAUAUGGAAACUGCGUGGAAGUGACGGCACUCCACGUAUGCCAUCUUUCUGUCACCUGGAAAGGU  
 GACGAGAAGACUCGGAACCCACGCGGCGUGACCCACAGCCGCGUGGGGCGAGUCCAUAUGUGGAACUAUCACUCCACGUGUUCUCCGUGGGGACACGUU  
 CUCGCGUGGCAUGCAUCUGCAGUACAAGAUACAGAGGCCCGGUUCGAUCUGCUGCUGGAGUGGCGUGUAUGUGCCGAUCGACCCGACCCUGACGCGAUGCGGCGU  
 ACAGCACCUGCCUGUACCCCGAAGCUCUCCAGUGUCUACGCCAUGAACAGUGGCGUCACUUUCACGAGUCCUACCCUGGCCAGAGAGUGGCCAGUACGGUG  
 UAUCAGAACUCGCGAGCACGACACAUAUACAGCGUACUGUCUGGGGAUCAGCCACAUGGAGCCAGCUUCGGGCGUAUCCUCCACGACGGGGUACCAGUUGAA  
 GUUCGUGGAUACCCCGAGUCACUCUUGGGUCUACGUGUUCGUUGUGUACUUAACGGACACGUGGAGGCGGUGGCGUACAGGUGGUCAGCACCGUUGACCACU

UCGUGAACGCCAUCGAGGAGCGGGGUUCCUCCUACGGCUGGUCAGCCCCGGCUACGACCAAGCCGAAGGAGAUAAACCCCGUUAACCCAGGCACAAGUCCACUG  
CUGCGGUACGCCCGCUGGACAGCGGCCUGGCCGACAGUAGUGCUCUUGUGCCUGGUAUUAUCCUGAUCUGCACCGCCAAGCGGAUGCGGGUCAAAGCCUUAUCGCGU  
CGACAAGAGCCCGUUAUAUACAGAGCAUGUAUAUGCGGGCUUGCCUGUCGACGAUUUUGAGGACUCGCGAGAGCACAGACACUGAGGAGGAGUUCGGGAUGCUAUAG  
GCGGGUCGCAUGGUGGAGUAGUUAUACGGGUCUACAUAAGACAAGACCCGG

>gE-B: (MFE -1082.9 kcal/mol, CAI 0.844)

AUGGGAACAGUAAACAAGCCCGUGGUCGGAGUUCUGAUGGGAUUCGGAUAUACACAGGCACGCUCCGGAUUAACAAUCCGGUGCGUGCCUCUGUCCCGGUAUGA  
UGACUUUAUUAUCGACGAGGACAAGCUGGACACCAACAGCGUGUACGAGCCCUAUUACCACUCCGACCCAGCGGAGUCCUGGGUCAAACCGGGGAGUCCUCCA  
GAAAGGCCUUAUGACCACAAUAGCCCUUACAUCUGGCCCGGAACGAUUAACGAGCGGUCCUGGAGAACGCCACGAGCACCACGGGUGUAACAACAGGGCCGCGGA  
AUCGAUUCGGGGAGAGGUGAUGCAGCCUACCCAGAUUCCGCCAGGAGACCUGGGCGACGACACUGGGAUCCAUGUCAUCCCCACCCUGAAUGGGGAUGACAG  
GCACAAGAUCGUGAACGUGGACAGCGGCAUACGGGACGUGUUAAGGGAGACCUCUAAUCCAAAGCCGAGGGCCAGCGGUGAUGAGGUCUCCUGGAGGAGA  
ACCACCCUUCACGUCGGGGCCCCAUUCAGCGCAUCUACGGGGUGCGGUACACCGAGACAUGGAGCUUCCUGCCAAGCCUCACAUGUACCGGUGAUGCCGACCC  
GCCAUCCAGCACAUUCGCUAAGCACACCAGUGCUUCCAGGAUGUGGGUGGACGUGGAUUGCGUGAGAUAUCCAAGGAGGAUCAGCUGGGGAGAUCCUUA  
UCGGUUCAGGGGAAGAAGGAGGCGGACCAGCCGUGGAUCGUCGUAACAACAAGCACCUCUUGUUGACGAGCUGGAGCUCGAUCCUCCUGAUGCAGCCCGGCGUGC  
UGAAGGUGCUGCGCACCGAGAAGCAGUAUCUCGGUGUGAUCUUGGAUAUCGUGGGAGUGACGGUACCUCCACAUAUGCCACCUUUCUGUACCCUGGAAAGGU  
GACGAGAAGACUCGGAAACCCACGCGCGUGACCCACAGCCGCGUGGGGCGGAGUUCUUAUGUGGAACUAUCACUCCACGUGUACGCGUGGGAGUAUCCU  
CUCCUCGCUAUGCACCUCAGUACAAGAUAUCCAGAGGCCCCUUCGAUCUUCUCCUGGAGUGGUGUACGUGCCCAUUGACCCACGUGCCAGCCUUAUGAGGCGUGU  
ACAGCAGUGCCUGUACCCCGAAACGCGCCACAGUGCCUGAGUCAUGAAUUCUGGCGUACCUUUAUAGCCCAUUCUGGCCAGAGGGUGGCUAGUACGGUG  
UACCAGAAUUGUGAGCAUGCAGACAUAUACAGCCUAUUGCCUGGGCAUCAGCCCAUUGGAGCCAGCUUUGGGCUGAUUCUGCAUGACGGGGUAACCACACUGAA  
GUUUGGGAUACCCCGAGUCCUCUCAGGCCUUAUCGUGUUCGUGGUGUACUUAUUGGACGUGGAGGCCGUGGCGUACACAGUGGUCAGCACCGUUGACCACU  
UCGUGAACGCCAUCGAGGAGCGGGGUUCCCGCCACGGCGGGACAGCCCCCGCUACCCAGAAAGCCGAAGGAGAUACGCCAGUGAAUCCUGGUACCCAGUCCACUG  
CUGCGGUACGCGUGGACUGGGGGCUCGACGGGUGUUCUCCUCUGCCUGGUAUCUCCUGAUCUGCACCGCCAAGCGGAUGCGGGUCAAAGCCUUAACGGGU  
GGACAAGUCCCGUACAACCCAGUCCAUUAUACGAGGACUCCCGUGGACGACUUCGAGGACUCGAGUACCCGACCCGAGGAAGAAUUCGGGAACGCCAUCG  
GGGUUCCACGGGGGCUCCUACACCGGUGUACAUCGACAAGACUCGG

>gE-C: (MFE -932.3 kcal/mol, CAI 0.901)

AUGGGAACAGUAAACAAGCCCGUAGUAGGAGUGCUCUAGGGUUUCGGAUAUACACCGGAACCCUGAGAAUACCAACCCAGUGCGGGUUCUGUCCUGCGGUAUGA  
UGACUUUAUUAUCGACGAGGACAAGCUGGACACCAACUCUGUGUACGAGCCCUAUUACCACAGCGACCACGUGAGUCCUCCUGGGUAAACCGGGGGAGUCCUCC  
GGAAGCCUUAUGACCACAAUAGCCCUUACAUCUGGCCCGGAACGAUUAACGAGCGGUCCUGGAGAACGCCACGAGCACCACGGGUGUAACAACAGGGCCGCGGA  
AUCGAUUCGGGGAGAGGUGAUGCAGCCUACCCAGAUUCCGCCAGGAGACCUGGGCGACGACACAGGAUCCAUGUCAUCCCCACCCUGAAUGGGGAUGACAG  
GCACAAGAUGUGAACGUGCAUCAGCGCCAGUAUGGGGAUGUGUUAAGGGCGACCUGAACCCAAAGCCCGAGGGCCAGCGCCUGAUCGAGGUGAGCGGAGGAGA  
ACCACCCAUUCACGUCGGCGCACCGAUCCAGCGGAUCUACGGGGUGCGCUACACUGAGACCUGGAGCUUCCUGCCAGUCUACCCUGCAGUGGGACGACGCCCC  
GCAAUCCAGCACAUUCGCUAAGCACACCAGUGCUUCCAGGAUGUGGGUGGACGUGGACUGCGCGAGAACAACCAAGGAGGACCAGCUGGCCGAGAUCAGCUA  
CCGCUUCCAGGGCAAGAAGGAGGCGGACCAGCCUGGAUCGUGGUGAACACCAGCACCUGUUCGACGAGCUGGAACUCGAUCCACCCUGAUGCAGCCCGGCGUGU  
UGAAGGUGCUGCGCACCGAGAAGCAGUAUCUCGGUGUGAUCUUGGAUAUUGCGGGGUGCCGAGCGGACCUCCACAUAACGCCACCUUUCUGGUGAUCUGGAAAGGU  
GACGAGAAGACUAGAACCUCUACCCUGUGGACACCACAGCCAAGAGGGGUGAGUUCACAUUGUGGAACUACCCAGCCAGCGUUUAGCGGGGAGUAUCCU  
CUCCUCGCUAUGCACCUCAGUACAAGAUAUCCAGAGGCCCCUUCGAUCUGCUGCUGGAGUGGUGUACGUGCCCAUUGACCCCAUGUACGCCAAUGAGGCGUGU  
ACAGCACAUGCCUGUACCCCAAAACGACACCACAGUGCCUGAGCCAUAGAACAGCGGGUGUACCUUACCCAGCCCUAUCUGGUCACGCGGGUGGCUAGCAGGGU  
UACCAGAACUGGAGCAGCAGACAUAUACCCGCCUACUGCCUGGGUAUCAGCCCAUUGGAGCCAGCUUUGGGCUGAUCUCCGACGAUGGAGGACCACCGCUAA  
GUUCGUGGACACCCCGAGAGCUGAGCGGCCUUAUCGUGUUCGUGGUGUACUUAUUGGACGUGGAGGCCGUGCCUACCCGUGGUCAGCACCGUGGACCCACU  
UCGUGAAUGCCAUCGAGGAGCGGGGUUCCUCCUACGGCCGGGACGCCUCCCGCCACCACAAAGCCCAAGGAGUAACCCCGGUGAAUCCGGGGACAUUCUCCUG  
CUGCGGUACGUCGUGGACCGGUGGGCUGGACGCCGUGGUGCUGUGCCUGGUAUCUCCUGAUCUGCAGCAGCAAAGCGGAUGCGGGUAAAGCCUUAACGGGU  
GGACAAGAGUCCCUACAACCCAGUCCAUUAUACGAGGACUCCCGUGGACGACUUCGAGGACUCUGAGUCCACCGACCCGAGGAGUUCGGCAACGCCAUCG  
GUGGACCCAGGAGGUGCCAGCUACCCGUGUACAUCGACAAGACACGG

>gE-D: (MFE -845.4 kcal/mol, CAI 0.918)

AUGGGAACAGUAAUAAGCCCGUAGUAGGAGUGCUCUAGGGUUCGGAUAUACACCGGCACCCUGCGGAUAACCAACCCCGUGCGGGCCUUCUGUCCUGCGGUAUGA  
CGACUCCAUUAUCGACGAGGACAAGCUGGACACCAACUCUGUGUACGAGCCCUAUUACCACAGCGACCACGUGAGAGUAGCUGGGUGAACAGAGGGGAGUCCAGCC

GGAAGGCCUACGAUCACAAUAGCCCUACAUCUGGCCCGGAAUGACUACGAUGGGUUUCUGGAGAACGCCACGAGCAUCACGGAGUGUAACAACCAAGGAAGAGGC  
AUUGAUUCAGGGGAGCCUGAUGCAGCCACCCAGAUGUCCGCCAGGAGACCUGGGGACGACACUGGGAUCCAUGUCAUCCCCACCCUGAAUGGGGAUGACAG  
GCACAAGAUGUGAACCGUGGACCAGAGGCAGUACGGGAUGUGUUAAGGGGCAUCUGAAUCCUAAAGCCACGGGGCAGAGACUGAUCGAGGUGAGCGUGGAGGAGA  
ACCACCCAUUCACGCUCGCGCACAAUACAGCGGAUUUACGGGGUGCGCUACACCGAGACUUGGUCUUUCCUGCCUCCUGACCUGCACCGGGGACGCAGCCCA  
GCCAUCCAACACAUCUGCCUGAAGCACACCACCCUGCUCCAGGAUGUGGUGGACGUGGACUGCGCCGAGAACCAAGGAGGAUCAGCUGGCUGAGAUCCUA  
CCGGUUCACAGGGAAAGAGGAGGCAGAUACGCCUGGAUCGUGGUGAAUACCAGCACCCUGUUCGACGAGCUGGAGCUGGAUCCACAGAGAUCCGAGCCCGGGGUGC  
UGAAGGUGCUGCGGACCGAGAAGCAGUACCCUGGAGUGUAUCAUCUGGAAUUGCGGGGUCGACGGGACCUCACAUACGCCACAUUCCUGGUCACCUGGAAGGGG  
GACGAGAAGACUCGCAACCCAAUCUCAGCAGUGACACCUCAGCCUGGGGGCUGAGUCCACAUGUGGAAUACACAGCCACGUGUUAGCGUGGGAGAUACCUU  
CUCCUCGCUAUGCACCCUCCAGUACAAGAUCACGAGGCCCCUUCGAUCUGCUGCUGGAGUGGCUUACGUGCCCAUCGACCCCAUGUCAGCCAAUGAGGCUGU  
ACAGCACAUGCCUGUACCCCAAAACGCACCACAGUGCCUGAGCCACAUGAACAGUGGCUGCACUUACCCAGCCUACCCUGGCCAGAGGGUGGCCUCCACCGUC  
UACCAGAACUGUGAGCACGUGACAACUACACAGCCUACUGCCUGGGCAUCAGCCACAUGGAGCCAGCUUUGGGCUGAUCCUCCACGACGGGGGACCAACCCUGAA  
GUUCGUGGACACCCCGAGAGCCUGAGCGGGCUGUACGUGUUCGUGGUGUACUUAACGGACACGUGGAGCCGUGGCCUACACCGUGGUCUCCACCGUGGACCAU  
UCGUGAAUGCCAUCCGAGGAGCGGGGUUCCUCCUACCGCCGGGACCCUCCGCCACCAAGCCAAAGGAGAUACCCCGGUGAACCCAGGCACAGUCCACUG  
CUGCGGUACGACGUGGACUGGGGCCUGGCCCGCGUGGUGCUGCUGGUGGUAUCUCCUCAUCUGCACCGCCAAGCGGAUGAGGUGAAGGCUUACAGAGU  
CGACAAGUCCCCUACAACCAGUCCAUGUACUACGAGGACUGCCUGGAGCAGUUCGAGGACUCUGAGAGCACCGACACCGAGGAGGAGUUCGGCAACGCCAUCCG  
GUGGCAGCCACGGAGGGUCCAGCUACACCGUGUACAUCGACAAGACACGG

>gE-E: (MFE -805.0 kcal/mol, CAI 0.930)

AUGGGAACAGUAAACAAGCCUGUGGUGGGCGUGCUGAUGGGCUUCGGCAUCAUCACAGGCACCCUGCGGAUACCAACCCAGUGCGGCCAGCUGUCGCGGUACGA  
UGACUCCACAUCGACGAGGACAAGCUGGACACCAACAGCGUGUACGAGCCUACUACCAUCGACCCACGUGAGUCCAGCUGGGUGAACCGGGGAGAGCUCCA  
GAAAGGCCUUAUGACCAAAUAGCCCUACAUCUGGCCCGGAAAGAUUACGACGGCUUCUGGAGAACGCCACGAGCACCCGGGGUGUAACAACAGGGCCCGGGC  
AUCGAUUCGGGGAGAGGUGAUGCAGCCUACCCAGAUUCCGCCAGGAGACCUGGGGACGACACUGGGAUCCAUGUCAUCCCCACCCUGAACGGGAUGACAG  
GCACAAGAUCGUGAACCGUGGACCAGCGCCAGUACGGGAUGUGUUAAGGGGCAUCUGAAUCCUAAAGCCACGGGGCAGCGCCUGAUCGAGGUGAGUGGAGGAGA  
ACCACCCUUCACACUGCGCGCUCCAUCCAGCGGAUCUACGGCGUGCGGUACACAGAGACCUGGAGCUUCCUGCCUCUGACCUGUACCGGGCAGCGCCCGCC  
GCCAUCCAGCACAUCUGCCUGAAGCACACCACCCUGCUCCAGGAUGUGGUGGUAUGUGGACUGCGCCGAGAACCAAGGAGGACCAGCUGGCCGAGAUACAGUA  
CCGCUUCCAGGGAAAGAGGAGGCUGAUACGCCUGGAUCGUGGUGAAACAUCACCCUUCGACGAGCUGGAGCUGGAUCCUCCUGAGAUCCGAGCCCGGGUAC  
UCAAGGUACUGCGCACGAAAAGCAGUACCCUGGUGUACAUCUGGAAACUGCGGGCUCGACGGGACUUCUACAUCGCCACCUUCCUGGUGACCUGGAAGGGC  
GAUGAGAAGACAAGAAACCCAAACCCAGCUGUACACCAAGAGGAGCGAGUUCACAUGUGGAAUACACUCCACCGUUCAGCUGGGGGACACCUU  
CAGCCUGGCCAUGCAUCUGCAGUACAAGAUCACAGGCCCCUUCGACCUGCUGGAGUGGUGUACGUGCCAAUCGACCCAACUCCAGCCAUGCCGGCUGU  
ACAGCACAUGCCUGUACCCCAAAACGCACCACAGUGUCUGAGCCACAUGAACAGCGGGUGUACCUUACCCAGCCCAACCCUGGCUCAGAGGGUGGCCUCCACAGU  
UACCAGAACUGUGAGCACGCCGACAACUACACAGCCUACUGCCUGGGCAUCUCCCAUUGGAGCCAGCUUUGGGCUGAUCCUCCAGCAGCGGGGACCAACCCUGAA  
GUUCGUGGACACCCUGAGAGCUUAUCGGGACUGUACGUUAUCGUAUAUCUUAACGGACACGUGGAGCCGUGGCCUACACAGUGGUGUCCACAGUGGACCAU  
UCGUGAACGCCAUCGAGGAGAGGGGUUCCUCCUACCGCCGGGACCCACAGCAACAACAAAGCAAAAGAGAUACCCCGGUGAAUCCUGGGACUCCCCCUG  
CUGCGGUACGUGCCUGGACCGGGCGCCUGGCCCGCGUGGUGCUGCUGGUGGUAUCUCCUGAUCUGCACCGCCAAGCGGAUGCGGGUGAAGGCUUACCGGGU  
GGACAAGAGCCCCUACAACCAGUCCAUGUACUACGUGGACUGCCCGUGGACGACUUCGAGGAUUCGAGUCCACCGACACCGAGGAGGAGUUCGGAACGCCAUCCG  
GAGGCAGCCACGGGGGCUUAGCUACACCGUGUACAUCGACAAGACACGG

>gE-Ther: (MFE -592.2 kcal/mol, CAI 0.937)

AUGGGCACCGUGAACAAAGCCUGUUGGGGCGUGCUGAUGGGCUUCGGCAUCAUCACAGGCACCCUGCGGAUACCAAUCCUGUGCGGGCUAGCGUGCUGAGUAACGA  
CGACUCCACAUCGACGAGGACAAGCUGGACACCAACAGCGUGUACGAGCCUACUACCAACAGCAUCACGCGGAGUCUAGCUGGGUACAACAGAGGCGAGAGCAGCA  
GAAAGGCCUACGACCAACAACAGCCCUACAUCUGGCCCGGAAACGACUACGAUGGGUUCUGGAAAUGCCACGAGCACCCAGGGCUGUACAUAUAGGAGAGGCG  
AUCGACAGCGGCGAGAGACUGAUGCAGCCUACACAGAUGAGCCCAAGAGGACCUGGGAGAUUAUACCGGAUCCACGUAUCCCAACAGUACCGGGACGACAG  
ACACAAGAUCGUGAACCGUGGACCAGCGGCAUACGGGACGUGUUAAGGGGACCCUGAAUCCUAAAGCCUACGGGCCAGCGCCUGAUCGAGGUGUCCGUGGAAGAGA  
AUCACCCUUCACACUGAGAGCCCUAUCCAGAGAAUUAACGGCGUGCGCUUAUCCGAGACAUGGUCCUUCUGCCAGCCUGACAUGUACCGGGGUAUGCCGUCU  
GCCAUCCAGCACAUAUUGCCUGAAGCACACCACCCUGUUCUCCAGGACGUGGUGGUAUGUGGACUGCGCCGAGAACCAAGAGGAUCAGCUGGCCGAGAUACAGUA  
CCGGUUCACAGGGAAAGAAAGAGGCCGACACCGCCUUGGAUCGUGGUAACACCAGCACACUGUUCGACGAGCUGGAACUGGACCCUCCUGAGAUUAAACCGGGGUGC  
UGAAGGUGCUGAGAACCAGAGAAGCAGUACCCUGGAGUGUAUCAUCUGGAAACUGAGAGGACGAGCGGACCCUACCUACGCCACCUUCCUGGUCACAUGGAAGGGC  
GACGAGAAAACCGGAACCCCAACCCAGCUGUACCCCUAACCUGAGGGCGCGAGUUCACAUGUGGAAUUAACACAGCCACGUGUACGCGGGGGAUACCUU



UAGCCUGGCCAUGCAUCUGCAGUACAAGAUAUCCACGAGGCCUUUCGACCUGCUGCGGAAUGGCGUACGUGGCCAUCGAUCCUACCUGCCAGCCUAUGCGGCUGU  
ACUCCACCUGUCUGUAUCACCCCAACGCUCUCCAGUGCCUGAGCCACAUGAAUAGCGGCUGCACCUUCACAAGCCUCACCUGGCUCAGCGAGUGGCCAGCACAGUG  
UACCAGAAUUGCGAGCAGCCGACAAUUAACCCGCCUACUGUCUGGGCAUCAGCCACAUGGAAACCUAGCUUCCGGCCUGAUCCUGCACGAUGGGCCACAACCCUGAA  
GUUCGUGGAUACCCUUGAGAGCCUGAGCGGCCUGUAUGUGUUCGUGGUGUAUCUUAACGGCCACGUGGAAGCCGUGGCCUACCCGUGGUGUCUACCUGGACCACU  
UCGUGAACGCCAUCGAGGAAAGAGGCUUCCCUCAACUGCUGGACAGCCUCCUGCCACCACCAAGCCUAAAGAAAUCACACCCGUGAAUCCCGGCACAAGCCACUG  
CUUAGAUACGCCCUUGGACAGGCGGACUGGCGUCUGUUGUUCUGCUGUGCCUGGUAUCUUCUGAUUCGACCCGCAAGCGGAUGAGAGUGAAGGCCUACAGAGU  
GGACAAGAGCCUUUAACAACAGAGCAUGUACUACGCGGCCUGCCUGGAGCAGACUUCGAGGAUAGCGGAGACCCGACACCCGGAAGAGUUCGGCAACGCCAUUG  
GAGGAUCUCACGGCGGCAGCAGCUAUACCGUGUACAUCGACAAGACCCGG

>gE-WT: (MFE -485.7 kcal/mol, CAI 0.656)

AUGGGGACAGUUAUAAACCCUGUGGUGGGGUUUAUGAUGGGGUUCGGAUUAUACCGGAAACGUUGCGUAUAAACGAAUCCGGUCAGAGAUCCGUCUUGCGAUACGA  
UGAUUUUUCACAUCAUGAUGAAGACAAACUGGAUACAAACUCCGUAUAUGAGCCUUAUCUACCAUUCAGAUCAUGCGGAGUCUUAUGGGUAAAUCGGGGAGAGUCUUCGC  
GAAAAGCGUAUGCAUUAACUCACCCUUAUUAUGGCCACGUAUGAUUAUGAUGGAUUUUUAGAGAACGCACACGAAACCAUGGGGUGUAUAAUCAGGGCCGUGGU  
AUCGAUAGCGGGAAACGGUUAUUGCAACCCACACAAUGUCUGCACAGGAGGAUCUUGGGGACGAUACGGGCAUCCAGUUAUCCUACGUUAAACGGCGAUGACAG  
ACAUAAAAUUGUAAAUGUGGACCAACGCUAAUACGGUGACGUGUUUAAAGGAGAUUUAAUCCAAAAACCCAAAGCCAAAGACUCAUUGAGGUGUCAGUGGAAGAAA  
AUCACCCGUUUACUUUACGCGCACCGAUUCAGCGGAUUUAUGGAGUCCGGUACACCGAGACUUGGAGCUUUUUGCCGUAUAAACCGUACGGGAGACGCAGCGCCC  
GCCAUCCAGCAUUAUUGUUUAAAACAUACAACUGCUUUAAGACGUGGUGGGAUGUGGAUUGCGGAAAAUACUAAAAGAGGAUCAGUUGCCGAAAUCAGUUA  
CCGUUUUCAAGGUAAGAAGGAAGCGGACCAACCGUGGAUUGUUGUAAACACGAGCACACUGUUUGAUGAACUCGAAUUAAGACCCCGGAGAUUGAACCGGGUGUCU  
UGAAAGUAUCUUCGGACAGAAAAACAUAUCUUGGGUGUGUACAUUUGGAACAUGCGCGGCUCCGAUGGUACGUCUACCUACGCCACGUUUUUGGUCACCUGGAAAGGG  
GAUGAAAAACAAGAAACCCUACGCCCGCAGUAACUCCUACAACCAAGAGGGGUGAGUUUCAUUGUGGAAUUAACACUCGCAUGUAUUUUCAGUUGGUGAUACGUU  
UAGCUUGGCAAUGCAUCUUCAGUAUAAAGUAACUGAAGCGCCAUUUGAUUUGCUGUJAGAGUGGUUGUAUUGUCCCCAUCGAUCCUACAUGUCAACCAUUGCGGUUUA  
AUUCUACGUGUUUGUAUCAUCCCAACGCACCCCAUUGCCUCUCUAUUGAAUUCGGUUGUAUUAUACCUCCGCCACAUUUAGCCCAGCGUGUUGCAAGCACAGUG  
UAUCAAAAUUGUGAACAUGCAGAUAAUCACCCGCAUUAUGUCUGGGAUUAUCUCAUUAUGGAGCCUAGCUUUGGUCUAAUCUUAACACGACGGGGGACCACGUUAAA  
GUUUGUAGAUACCCCGAGAGUUUGCGGGAUUAUCGUUUUUGGUGUAUUUUAACGGGCAUGUUGAAGCCGUAGCAUACACUGUUGUAUCCACAGUAAGAUCAUU  
UUGUAAACGCAAUUGAAGAGCGUGGAUUUCCGCCAACGGCCGGUCAGCCACCGGCGACUACUAAACCCAAAGGAAUUAACCCCGUAAAACCCCGGAACGUCACCACUU  
CUACGAUUAUGCCGAUUGGACCCGAGGGCUUGCAGCAGUAUUAUUGUCUGUAUUAUUUUUAUCUGUAACGGCUAAAACGAAUGAGGGUUAAGCCUUAUAGGGU  
AGACAAGUCCCGUAUAAACCAAGCAUGUAUUAACGUGGCCUCCAGUGGACGAUUAUGGAGACUCGGAAUCUACGGAUACGGAAGAAGAGUUUGUAACGCGAUUG  
GAGGGAGUCACGGGGUUCGAGUUAACGGUGUAUUAAGAUAAAGACCCGG

The 5' and 3' UTR sequences used in the VZV mRNA vaccine experiments are listed below.

> 5' UTR

AGGAAAUCCAUUUGGCGCAGCUUCUGGAGGGAGCCGACAGGAGACGUGGGGAGACGGCCACC

> 3' UTR

GCUGCCUUCUGCGGGGCUUGCCUUCUGGCCAUGCCUUCUUCUCUCCUUGCACCCUGUACCUCUUGGUCUUGAAUAAAGCCUAGAGGAAGU
